# Supplementary material for: Cloning of the I gene reveals a dynamic NLR cluster conferring durable and broad-spectrum potyvirus resistance in common bean
Source: Research Square preprint supplement (doi:10.21203/rs.3.rs-7216335/v1), 2025-07-30
Supplement: Supplementary file 1 [file 7cb4ce9bac221901f83ab452.docx]

| **Supplementary Table 1**. HiFi sequencing statistics | | |
| --- | --- | --- |
|  | **Genotype** | |
| ***Sequencing feature*** | **BAT93-HiFi** | **JaloEEP558-HiFi** |
| Total number of CCS reads | 1311207 | 1898624 |
| Total size of reads (coverage) | 21099762635 (31 X) | 34710124064 (57X) |
| Mean read size (Kb) | 16.1 | 18.3 |
| Median read size (Kb) | 15.6 | 17.5 |

| **Supplementary Table 2**. Hi-C statistics | | |
| --- | --- | --- |
|  | **Genotype** | |
| ***Sequencing feature*** | **BAT93-HiFi** | **JaloEEP558-HiFi** |
| Total size of data (Gb) (Coverage) | 92.5 | 61.1 |
| Genome coverage | 111.42 X | 78.5X |
| Sequenced reads (paired-end) | 468406039 | 309505651 |
| Alignable (Normal+Chimeric Paired) | 95671931 | 9463453 |
| Total Hi-C Contacts | 14272916 | 101538584 |
| Inter-chromosomal contacts | 5978856 | 33426554 |
| Intra-chromosomal contacts | 8294060 | 68112030 |
| Short Range (<20Kb) contacts | 5009406 | 62930506 |
| Long Range (>20Kb) contacts | 3283440 | 5180467 |

| **Supplementary Table 3**. Global annotation statistics | | |
| --- | --- | --- |
|  | **Genotype** | |
| ***Genome annotation*** | **BAT93-HiFi** | **JaloEEP558-HiFi** |
| Annotated protein-coding genes | 28522 | 28129 |
| non-coding RNAs | 11965 | 12751 |
| MIRs | 124 | 129 |
| tRNAs | 5717 | 5670 |
| rRNAs | 5129 | 5670 |
| Complete BUSCOs* (%) | 96.7 | 97.0 |
| Fragmented BUSCOs* (%) | 2.1 | 1.9 |
| Missing BUSCOs* (%) | 1.2 | 1.1 |

*BUSCOs database: *Embryophyta* (n=1614)

**Supplementary Table 4.** Genomic statistics comparison in different genome assemblies of *P. vulgaris*

| **Genotype** | **Assembly name** | **Sequencing/Scaffolding** | **Size Mb (11 Chr)** | **N50 Mb (L50)** |
| --- | --- | --- | --- | --- |
| G19833 | Pvulgaris_441_v2.0 | PacBIo RSII, Illumina /Genetic Map | 537.2 | 49.7 (5) |
| BAT93 | phasIbeam10.0 | Roche454+Illumina+SOLiD+Sanger | 494.9 | 0.52 (267) |
| BAT-Cinvestav | bat93all7-045.contigs | PacBIo RSII | 566.8 (Contigs) | 6.1 (29) |
| BAT93 | BAT93-HiFi | PacBio Sequel II/Hi-C | 569.4 | 52.3 (6) |
| JaloEEP558 | JaloEEP558-HiFi | PacBio Sequel II/Hi-C | 539.9 | 49.8 (6) |
| Labor Ovalle | PvulgarisLaborOvalle_670_v1.0 | PacBio Sequel II/Hi-C | 571.9 | 55.3 (5) |
| UI111 | PvulgarisUI11_534_v1.0 | PacBIo RSII, Illumina/ Genetic Map | 554.9 | 51.1 (5) |
| 5-593 | 5-593 v1.1 | PacBio Sequel II/Hi-C | 572.2 | 54.8 (5) |

| **Supplementary Table 5**. RNA-seq data used for annotation of BAT93-HiFi | | | |
| --- | --- | --- | --- |
| **Sample Name** | **Accession/ref** | **Sequencing** | **# Reads** |
| Embryo + Cotyledons 48 hours old | SRR1024145 | Illumina HiSeq 2000 paired end sequencing | 15689781 |
| Embryo + Cotyledons 48 hours old | SRR1025259 | Illumina HiSeq 2000 paired end sequencing | 10700478 |
| Hypocotyl 48 hours old | SRR1025260 | Illumina HiSeq 2000 paired end sequencing | 16688099 |
| Hypocotyl 48 hours old | SRR1025261 | Illumina HiSeq 2000 paired end sequencing | 12079256 |
| Radicle 48 hours old | SRR1025262 | Illumina HiSeq 2000 paired end sequencing | 17240979 |
| Radicle 48 hours old | SRR1025263 | Illumina HiSeq 2000 paired end sequencing | 10055529 |
| Cotyledons 6 days old | SRR1025264 | Illumina HiSeq 2000 paired end sequencing | 23749232 |
| Cotyledons 6 days old | SRR1025265 | Illumina HiSeq 2000 paired end sequencing | 10991311 |
| Hypocotyl 6 days old | SRR1025266 | Illumina HiSeq 2000 paired end sequencing | 23773765 |
| Hypocotyl 6 days old | SRR1025267 | Illumina HiSeq 2000 paired end sequencing | 11217188 |
| Primary leaf 6 days old | SRR1025268 | Illumina HiSeq 2000 paired end sequencing | 18727187 |
| Primary leaf 6 days old | SRR1025269 | Illumina HiSeq 2000 paired end sequencing | 8433622 |
| Epicotyl 6 days old | SRR1025278 | Illumina HiSeq 2000 paired end sequencing | 19161714 |
| Epicotyl 6 days old | SRR1025279 | Illumina HiSeq 2000 paired end sequencing | 8776111 |
| Primary root 6 day old s | SRR1025280 | Illumina HiSeq 2000 paired end sequencing | 22147105 |
| Primary root 6 days old | SRR1025281 | Illumina HiSeq 2000 paired end sequencing | 9667488 |
| First trifoliate leaf 10 days old | SRR1025282 | Illumina HiSeq 2000 paired end sequencing | 18875623 |
| First trifoliate leaf 10 days old | SRR1025283 | Illumina HiSeq 2000 paired end sequencing | 10525934 |
| Hypocotyl 10 days old | SRR1025284 | Illumina HiSeq 2000 paired end sequencing | 17770320 |
| Hypocotyl 10 days old | SRR1025285 | Illumina HiSeq 2000 paired end sequencing | 13640111 |
| Primary leaf 10 days old | SRR1025286 | Illumina HiSeq 2000 paired end sequencing | 18627724 |
| Primary leaf 10 days old | SRR1025287 | Illumina HiSeq 2000 paired end sequencing | 9942818 |
| Root 10 days old | SRR1025288 | Illumina HiSeq 2000 paired end sequencing | 18593247 |
| Neck of the root old 14 days | SRR1025289 | Illumina HiSeq 2000 paired end sequencing | 18849831 |
| Trifoliate leaf 14 day old s | SRR1025290 | Illumina HiSeq 2000 paired end sequencing | 19952837 |
| Trifoliate leaf 14 days old | SRR1025291 | Illumina HiSeq 2000 paired end sequencing | 5997183 |
| Root 14 days old | SRR1025292 | Illumina HiSeq 2000 paired end sequencing | 9997984 |
| Root 14 days old | SRR1025293 | Illumina HiSeq 2000 paired end sequencing | 18128750 |
| Stem 14 days old | SRR1025294 | Illumina HiSeq 2000 paired end sequencing | 7198543 |
| Trifoliate leaf 29 days old | SRR1025295 | Illumina HiSeq 2000 paired end sequencing | 9207894 |
| Hypocotyl 29 days old | SRR1025300 | Illumina HiSeq 2000 paired end sequencing | 20783357 |
| Hypocotyl 29 days old | SRR1025301 | Illumina HiSeq 2000 paired end sequencing | 23856591 |
| Root 29 days old | SRR1025302 | Illumina HiSeq 2000 paired end sequencing | 12433138 |
| Trifoliate leaf 35 days old | SRR1025303 | Illumina HiSeq 2000 paired end sequencing | 17755981 |
| Trifoliate leaf 35 days old | SRR1025304 | Illumina HiSeq 2000 paired end sequencing | 21509492 |
| Stem node 35 days old | SRR1025305 | Illumina HiSeq 2000 paired end sequencing | 13164438 |
| Stem 35 days old | SRR1025306 | Illumina HiSeq 2000 paired end sequencing | 18720750 |
| Stem 35 days old | SRR1025307 | Illumina HiSeq 2000 paired end sequencing | 22772539 |
| Axial meristem 35 days old | SRR1025309 | Illumina HiSeq 2000 paired end sequencing | 9402505 |
| Axial meristem 35 days old | SRR1025310 | Illumina HiSeq 2000 paired end sequencing | 20927740 |
| Trifoliate leaf 43 days old | SRR1025313 | Illumina HiSeq 2000 paired end sequencing | 22866527 |
| Trifoliate leaf 43 days old | SRR1025314 | Illumina HiSeq 2000 paired end sequencing | 17957896 |
| Stem node 43 days old | SRR1025318 | Illumina HiSeq 2000 paired end sequencing | 30195195 |
| Stem node 43 days old | SRR1025319 | Illumina HiSeq 2000 paired end sequencing | 21893505 |
| Root 43 days old | SRR1025320 | Illumina HiSeq 2000 paired end sequencing | 7881321 |
| Root 43 days old | SRR1025321 | Illumina HiSeq 2000 paired end sequencing | 18341351 |
| Axial meristem 43 days old | SRR1025322 | Illumina HiSeq 2000 paired end sequencing | 20277370 |
| Axial meristem 43 days old | SRR1025323 | Illumina HiSeq 2000 paired end sequencing | 22683255 |
| Flower bud 50 days old | SRR1025324 | Illumina HiSeq 2000 paired end sequencing | 29556408 |
| Flower 53 days old | SRR1025325 | Illumina HiSeq 2000 paired end sequencing | 19583364 |
| Flower 53 days old | SRR1025326 | Illumina HiSeq 2000 paired end sequencing | 18472357 |
| Small pod 60 days old | SRR1025327 | Illumina HiSeq 2000 paired end sequencing | 11755221 |
| Small pod 60 days old | SRR1025328 | Illumina HiSeq 2000 paired end sequencing | 19011053 |
| Medium pod 64 days old | SRR1025329 | Illumina HiSeq 2000 paired end sequencing | 35302797 |
| Medium pod 64 days old | SRR1025330 | Illumina HiSeq 2000 paired end sequencing | 20503175 |
| Inmature seed 79 days old | SRR1025331 | Illumina HiSeq 2000 paired end sequencing | 27623218 |
| Inmature seed 79 days old | SRR1025332 | Illumina HiSeq 2000 paired end sequencing | 20597625 |
| Mature pod without seeds 79 days old | SRR1025333 | Illumina HiSeq 2000 paired end sequencing | 13472670 |
| Mature pod without seeds 79 days old | SRR1025334 | Illumina HiSeq 2000 paired end sequencing | 20040352 |
| Mature pod 86 days old | SRR1025335 | Illumina HiSeq 2000 paired end sequencing | 25938804 |
| Mature pod 86 days old | SRR1025336 | Illumina HiSeq 2000 paired end sequencing | 19672075 |
| Cotyledonary leaves inoculated C531_48h_1 | Alvarez-Diaz et al. 2022 | Illumina NextSeq 500 paired end sequencing | 136806899 |
| Cotyledonary leaves inoculated C531_48h_2 | Alvarez-Diaz et al. 2022 | Illumina NextSeq 500 paired end sequencing | 11930772 |
| Cotyledonary leaves inoculated C531_48h_3 | Alvarez-Diaz et al. 2022 | Illumina NextSeq 500 paired end sequencing | 12758275 |
| Cotyledonary leaves inoculated C531_48h_4 | Alvarez-Diaz et al. 2022 | Illumina NextSeq 500 paired end sequencing | 18730662 |
| Cotyledonary leaves inoculated C531_72h_1 | Alvarez-Diaz et al. 2022 | Illumina NextSeq 500 paired end sequencing | 17699543 |
| Cotyledonary leaves inoculated C531_72h_2 | Alvarez-Diaz et al. 2022 | Illumina NextSeq 500 paired end sequencing | 16643444 |
| Cotyledonary leaves inoculated C531_72h_3 | Alvarez-Diaz et al. 2022 | Illumina NextSeq 500 paired end sequencing | 11953738 |
| Cotyledonary leaves inoculated C531_72h_4 | Alvarez-Diaz et al. 2022 | Illumina NextSeq 500 paired end sequencing | 18912720 |
| Cotyledonary leaves inoculated Cl42_48h_1 | Alvarez-Diaz et al. 2022 | Illumina NextSeq 500 paired end sequencing | 12627584 |
| Cotyledonary leaves inoculated Cl42_48h_2 | Alvarez-Diaz et al. 2022 | Illumina NextSeq 500 paired end sequencing | 13418094 |
| Cotyledonary leaves inoculated Cl42_48h_3 | Alvarez-Diaz et al. 2022 | Illumina NextSeq 500 paired end sequencing | 19481756 |
| Cotyledonary leaves inoculated Cl42_48h_4 | Alvarez-Diaz et al. 2022 | Illumina NextSeq 500 paired end sequencing | 19469459 |
| Cotyledonary leaves inoculated Cl42_72h_1 | Alvarez-Diaz et al. 2022 | Illumina NextSeq 500 paired end sequencing | 105202600 |
| Cotyledonary leaves inoculated Cl42_72h_2 | Alvarez-Diaz et al. 2022 | Illumina NextSeq 500 paired end sequencing | 13154442 |
| Cotyledonary leaves inoculated Cl42_72h_3 | Alvarez-Diaz et al. 2022 | Illumina NextSeq 500 paired end sequencing | 27568827 |
| Cotyledonary leaves inoculated Cl42_72h_4 | Alvarez-Diaz et al. 2022 | Illumina NextSeq 500 paired end sequencing | 23268905 |

| **Supplementary Table 6.** RNA-seq data used for annotation of JaloEPP558-HiFi | | | |
| --- | --- | --- | --- |
| **Name** | **Accession** | **Sequencing** | **# Reads** |
| PVULG_JaloEEP558-TAL18H-H2-3 | SRX8819564 | Illumina HiSeq 3000 paired end sequencing | 26394779 |
| PVULG_JaloEEP558-TAL18H-W2-2 | SRX8819566 | Illumina HiSeq 3000 paired end sequencing | 18387872 |
| PVULG_JaloEEP558-TAL18H-H2-1 | SRX8819562 | Illumina HiSeq 3000 paired end sequencing | 29080436 |
| PVULG_JaloEEP558-TAL18H-H2-2 | SRX8819563 | Illumina HiSeq 3000 paired end sequencing | 30404194 |
| PVULG_JaloEEP558-TAL18H-W2-1 | SRX8819565 | Illumina HiSeq 3000 paired end sequencing | 15056487 |
| PVULG_JaloEEP558-TAL18H-W2-3 | SRX8819567 | Illumina HiSeq 3000 paired end sequencing | 16698533 |
| Cotyledonary leaf - flg22 treated (6 hours) | This study | Illumina NextSeq 500 paired end sequencing | 31966668 |
| Root 14 days old | This study | Illumina NextSeq 500 paired end sequencing | 33182259 |
| Root 35 days old | This study | Illumina NextSeq 500 paired end sequencing | 32448159 |
| Stem 35 days old | This study | Illumina NextSeq 500 paired end sequencing | 32756695 |
| Trifoliate leaf - flg22 treated (6 hours) | This study | Illumina NextSeq 500 paired end sequencing | 32360905 |

**Supplementary Table 7.** Nanopore Long reads used to refine cluster *I* TNLs annotation

| **Genotype** | **Conditon (hpi*)** | **organ** | **Sequencing** | **Total reads** | **Mapped reads** |
| --- | --- | --- | --- | --- | --- |
| BAT93-WT | Mock | 9 days old Leaf | Oxford Nanopore MinION | 2142871 | 2154394 |
| BAT93-WT | 7 | 9 days old Leaf | Oxford Nanopore MinION | 2000735 | 2010396 |
| BAT93-WT | 24 | 10 days old Leaf | Oxford Nanopore MinION | 790559 | 795030 |
| BAT93-WT | 48 | 11 days old Leaf | Oxford Nanopore MinION | 4437174 | 4448818 |
| BAT93-WT | 120 | 14 days old Leaf | Oxford Nanopore MinION | 2543205 | 2549973 |
| BAT93-TE | 0 | 9 days old Leaf | Oxford Nanopore MinION | 2322663 | 2327806 |
| BAT93-M822 | 0 | 9 days old Leaf | Oxford Nanopore MinION | 2502264 | 2509016 |
| BAT93-M822 | 0 | 9 days old Leaf | Oxford Nanopore PromethION | 1448538 | 1328144 |
| BAT93-WT | Mock | 9 days old Leaf | Oxford Nanopore PromethION | 862773 | 790000 |
| BAT93-WT | 6 | 9 days old Leaf | Oxford Nanopore PromethION | 1332795 | 1200597 |
| BAT93-WT | 24 | 10 days old Leaf | Oxford Nanopore PromethION | 895597 | 803853 |
| BAT93-WT | NA | 9 days old Roots | Oxford Nanopore PromethION | 1003537 | 972791 |
| BAT93-WT | 0 | 9 days old Leaf | Oxford Nanopore PromethION | 1062469 | 648125 |
| JaloEEP558 | NA | 9 days old Leaf | Oxford Nanopore PromethION | 1360643 | 985546 |
| *Hours post BCMNV-NL3 infection | | | | | |

**Supplementary Table 8.** List of primers used in this study.

| **Target** | **Primer name** | **Sequence (5’ - 3’)** | **Reference** |
| --- | --- | --- | --- |
| *I* Gene | GeneI_5UTR_2F | TGGTAGAAACAAAGGCACTGAGAGTT | This study |
| GeneI_x1_2R | CTTTGCCCCTGACTAATCTGTCATC |
| GT8 | CACCTCTTGTGGATCTGCCA |
| Gene2_seq_F | GGTAGAAATGGTAGAAACAAAGGCA |
| GT3 | GAAGCATCTGCGCAAACTCA |
| LRR2exp_R | CACGGAAATCAAGCTTCCTCA |
| Retand *I* | Retand_*I*_1F | AACAAGAGGTTGCATTGCACCATT | This study |
| Retand_*I*_1R | TCTGTTCTGCCATAGCGTCGTTGT |
| GT7 | CCCGTCTCTCCACTCAGGTA |
| GT4 | GTCGTGCTCCGGAATACTCG |
| Retand *I* family | Retand_*I*_3F | TAAGGCATGCCCAAATGCCAAGAG | This study |
| Retand_I_3R | CCGATCATGTCGTGGAATACATGGT |
| BCMV | CPF02F | ATCGGATCGAGCAAGAGA | (Çelik et al. 2023) |
| CPF02R | GTCCCTTGCAGTGTGCCTTT |
| BCMNV | BCMNV_3F | AAGGCCCAGCGGATAAAGACGTT | This study |
| BCMNV_3R | TCGATGCACCACACCATGAAGCCA |
| *PvIDE* | IDE qPCR F | GCAACCAACCTTTCATCAGC | (Borges et al. 2012) |
| IDE qPCR R | AGAAATGCCTCAACCCTTTG |
| M822v2 | M822v2_Fa | gcgggcagggcggc-ATTTTCTAAATCATCGCC**A** | This study |
| M822v2_R | AGGATGCAACAAGGACTGAA |
| M822v2_Fb | gcgggc-TTATTTTCTAAATCATCGCC**T** |

|  | **BAT93-HiFi** | | | **JaloEEP558-HiFi** | | | **G19833 v2.1** | | |
| --- | --- | --- | --- | --- | --- | --- | --- | --- | --- |
| **TE Class** | **% of genome** | **Copy number** | **bp** | **% of genome** | **Copy number** | **bp** | **% of genome** | **Copy number** | **bp** |
| **Retrotransposon** | 16.99 | 70754 | 111541170 | 26.73 | 108222 | 177341528 | 22.72 | 76073 | 155140474 |
| **LTR-Retrotransposon** | 14.18 | 41633 | 93938171 | 23.14 | 62584 | 155541504 | 19.96 | 45973 | 139769920 |
| **Gypsy** | 8.38 | 7825 | 50859793 | 13.93 | 9646 | 84513134 | 12.00 | 8822 | 76408036 |
| Chromovirus | 0.02 | 46 | 102915 | 0.02 | 22 | 104951 | 0.02 | 24 | 104887 |
| CRM | 2.28 | 2581 | 13806199 | 4.38 | 4034 | 26590737 | 3.78 | 3643 | 24080473 |
| Reina | 0.09 | 318 | 527030 | 0.11 | 134 | 650475 | 0.11 | 141 | 683809 |
| Tekay | 0.13 | 741 | 811908 | 0.14 | 195 | 855052 | 0.10 | 186 | 654992 |
| Athila | 0.32 | 1105 | 1922669 | 0.32 | 637 | 1961731 | 0.32 | 670 | 2025268 |
| Retand | 5.55 | 3034 | 33689072 | 8.96 | 4624 | 54350188 | 7.68 | 4158 | 48858607 |
| **Copia** | 2.59 | 4591 | 15718554 | 4.32 | 4583 | 26217809 | 4.02 | 4449 | 25613112 |
| Ale | 0.47 | 2283 | 2874850 | 0.53 | 1043 | 3220339 | 0.51 | 960 | 3262386 |
| Ikeros | 0.09 | 199 | 527611 | 0.15 | 236 | 894268 | 0.14 | 232 | 917853 |
| Ivana | 0.85 | 912 | 5177533 | 1.47 | 1324 | 8940352 | 1.37 | 1331 | 8718108 |
| SIRE | 0.93 | 721 | 5618633 | 1.74 | 1313 | 10553513 | 1.58 | 1255 | 10078489 |
| TAR | 0.03 | 35 | 209201 | 0.05 | 52 | 314640 | 0.05 | 52 | 315628 |
| Tork | 0.22 | 441 | 1310726 | 0.38 | 615 | 2294697 | 0.36 | 619 | 2320648 |
| **TRIM** | 0.24 | 6387 | 1510263 | 0.24 | 6219 | 1478292 | 0.28 | 6243 | 1487448 |
| Unknown | 1.59 | 18239 | 10131007 | 2.82 | 37553 | 17114460 | 1.98 | 22010 | 10648212 |
| non-LTR-Retrotransposons | 0.98 | 4495 | 5961729 | 0.53 | 1866 | 3207272 | 0.51 | 1847 | 3234894 |
| **DNA-Transposons** | 1.07 | 3595 | 6491762 | 0.71 | 1252 | 4311018 | 0.64 | 1134 | 4092085 |
| TIR | 0.95 | 3123 | 5754636 | 0.61 | 1108 | 3715941 | 0.55 | 997 | 3527274 |
| CACTA | 0.68 | 1740 | 4100071 | 0.42 | 575 | 2553601 | 0.40 | 569 | 2566132 |
| Mutator | 0.13 | 427 | 793477 | 0.09 | 203 | 566249 | 0.09 | 205 | 570060 |
| Harbinger | 0.04 | 287 | 255003 | 0.03 | 151 | 176472 | 0.03 | 155 | 175729 |
| hAT | 0.10 | 669 | 606085 | 0.07 | 179 | 419619 | 0.03 | 68 | 215353 |
| Helitron | 0.12 | 472 | 737126 | 0.10 | 144 | 595077 | 0.09 | 137 | 564811 |
| Unknown | 11.58 | 55590 | 73736087 | 10.74 | 51125 | 65148088 | 11.51 | 52016 | 61827146 |
| **Total** | 30.51 | 131685 | 197020980 | 38.71 | 162465 | 250007906 | 35.38 | 131070 | 224294599 |

**Supplementary Table 9.** Summary of transposable element composition of the genome assemblies of *P. vulgaris*.
