# Supplementary material for: Cloning of the I gene reveals a dynamic NLR cluster conferring durable and broad-spectrum potyvirus resistance in common bean
Source: Research Square preprint supplement (doi:10.21203/rs.3.rs-7216335/v1), 2025-07-30
Supplement: Supplementary file 1 [file c5bcab76deb8a8c6db557208.pdf]

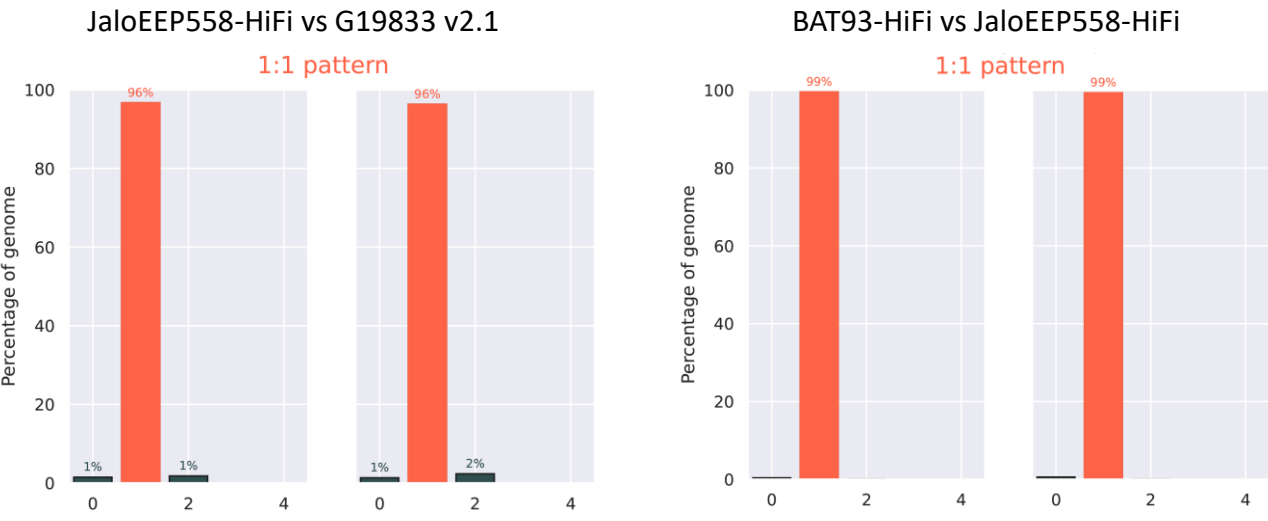

Supplementary Figure 1. Syntenic relationship between sequenced and reference genome assemblies

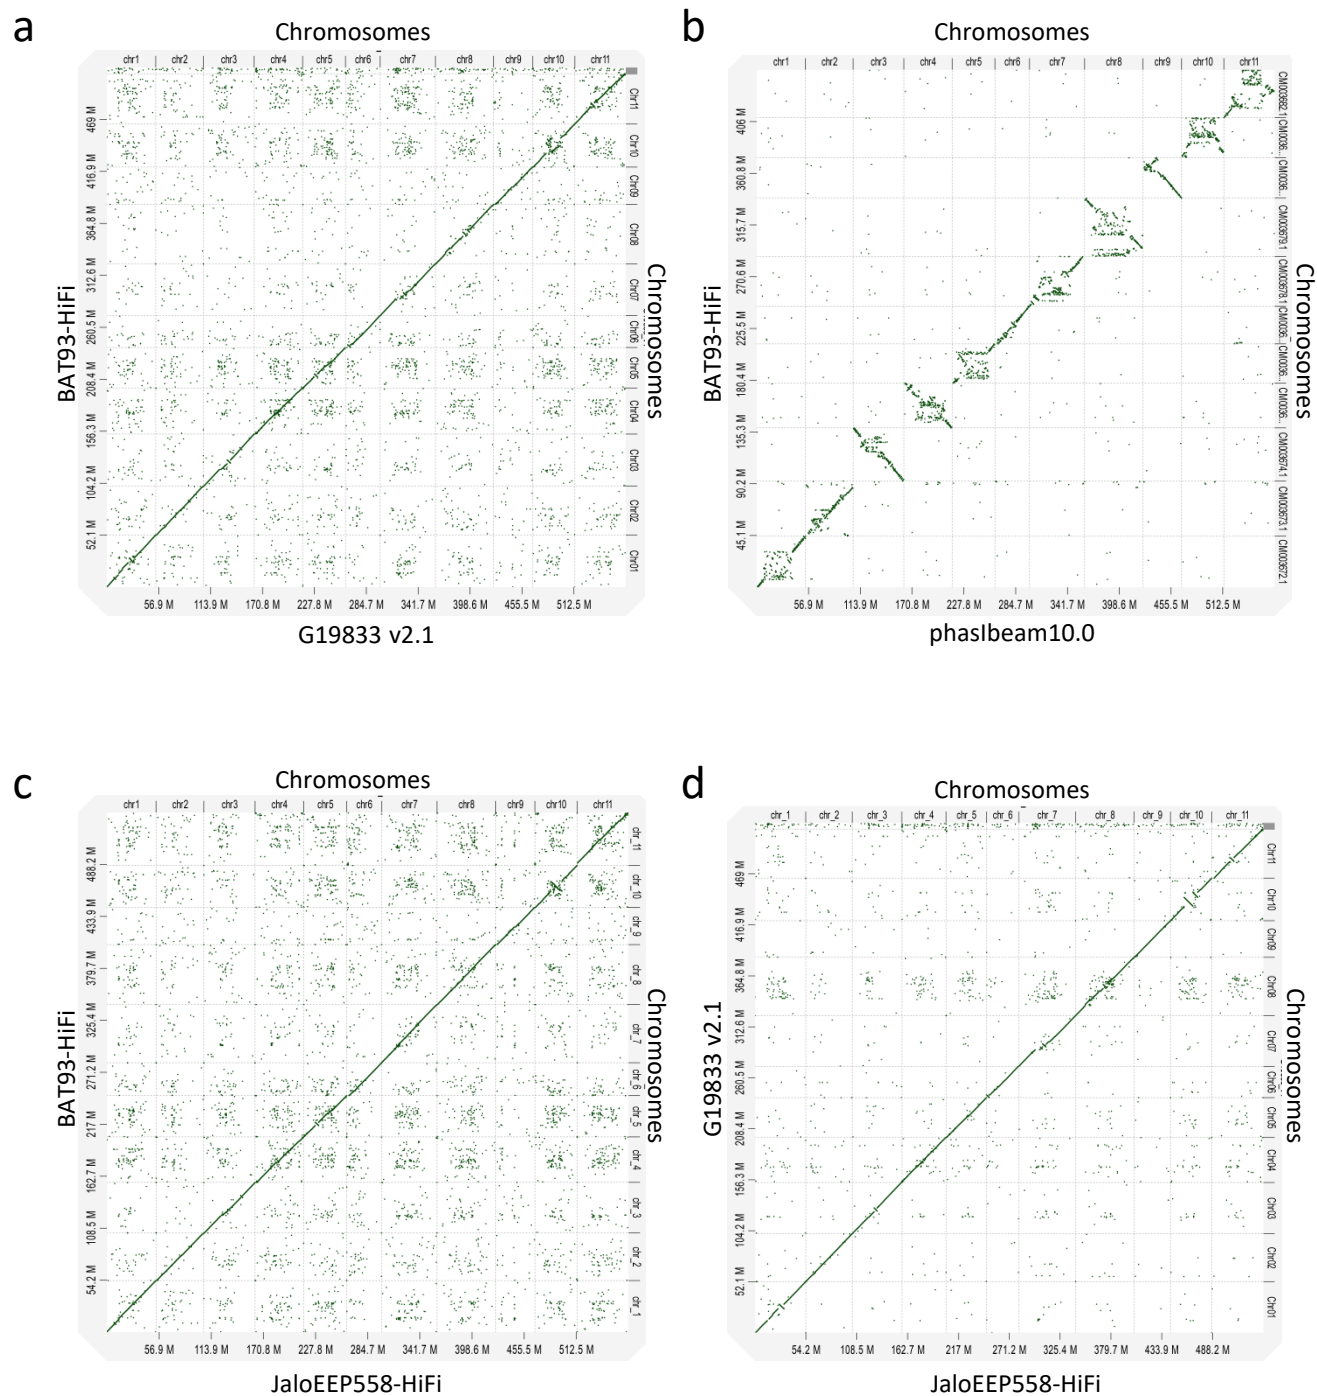

**Supplementary Figure 2. Comparative synteny dot plot between assembled genomes of G19833 v2.1, BAT93-HiFi, JaloEEP558-HiFi and BAT93 (phasIbeam10.0)**

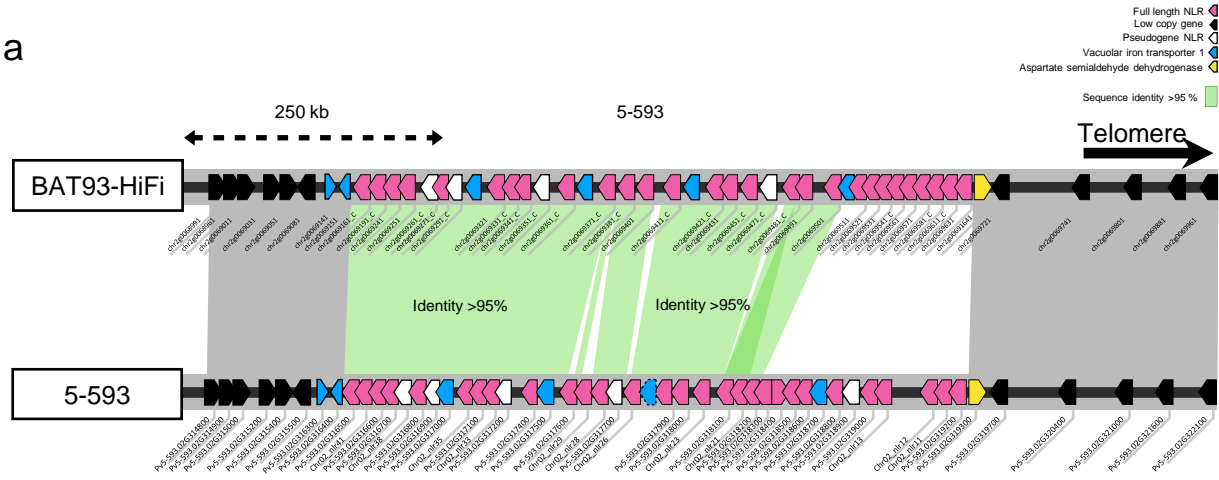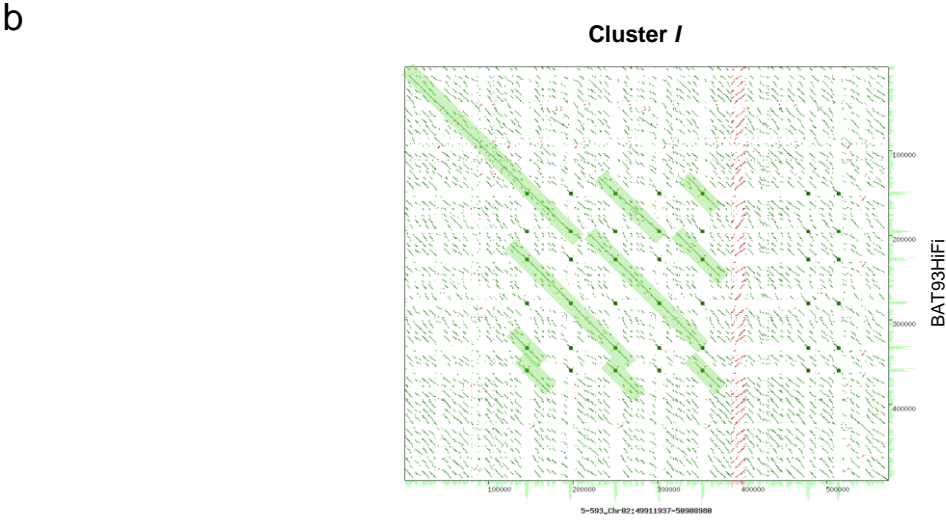

**Supplementary Figure 3. Comparative analysis between two / bearing genotypes BAT93 and 5-593. a. Representation of the synteny of the / cluster. b. Dot-plot analysis of the / cluster between the two genotypes (TNL containing region).**

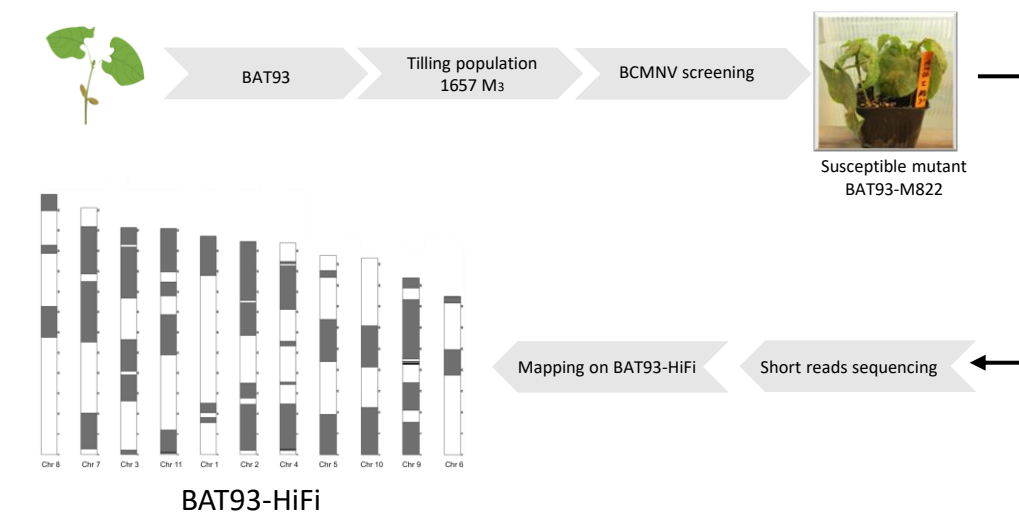

**Supplementary Figure 4. Workflow for the identification of the *I* gene on the BAT93-HiFi genome assembly**

## / Gene (Chrg0069161)

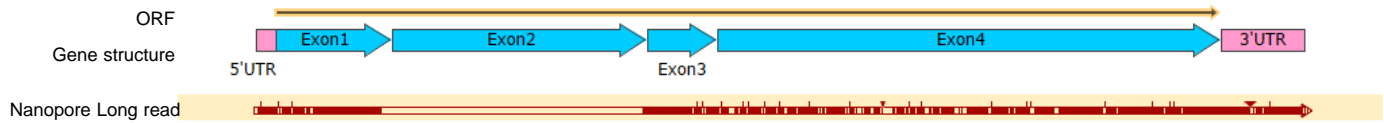

**Supplementary Figure 5. Schematic representation of Nanopore long reads from BAT93-M822 mapped in the / gene showing exon 2 skipping**

# BAT93-HiFi

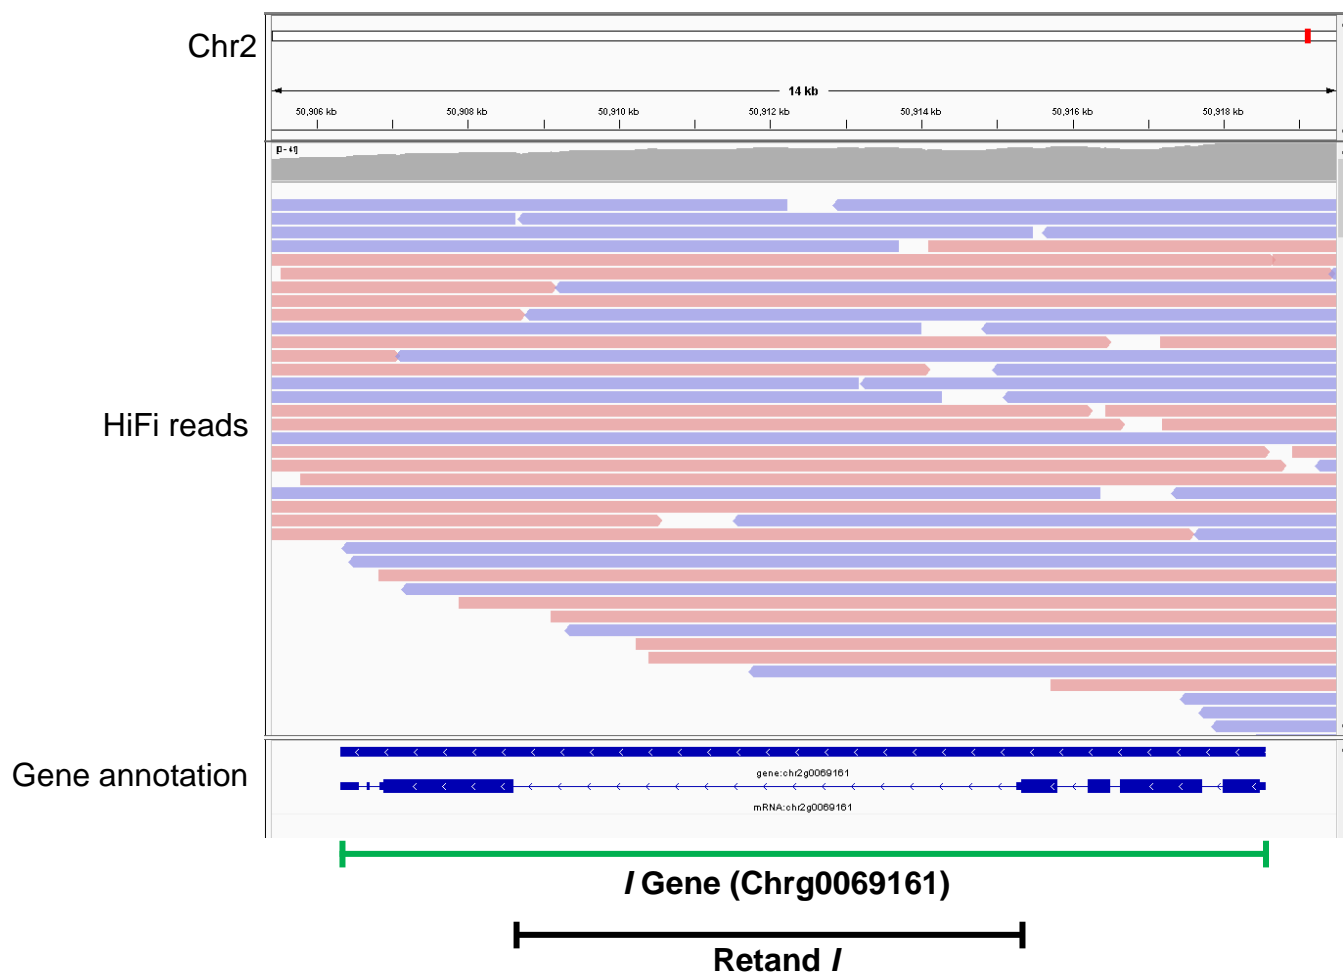

Supplementary Figure 6. Read coverage of the region containing gene 2 in BAT93-HiFi, visualized on IGV

a

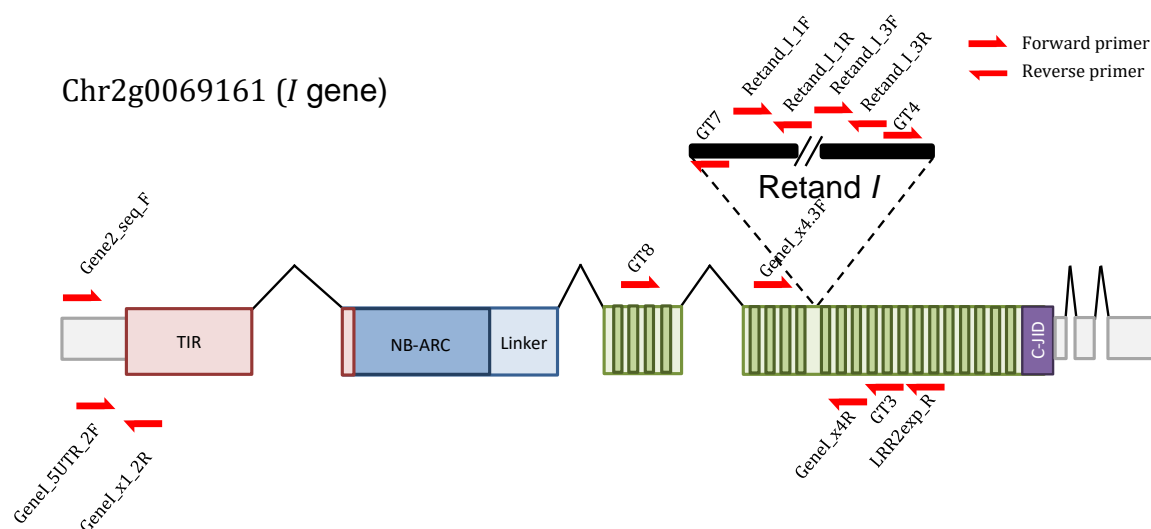

b

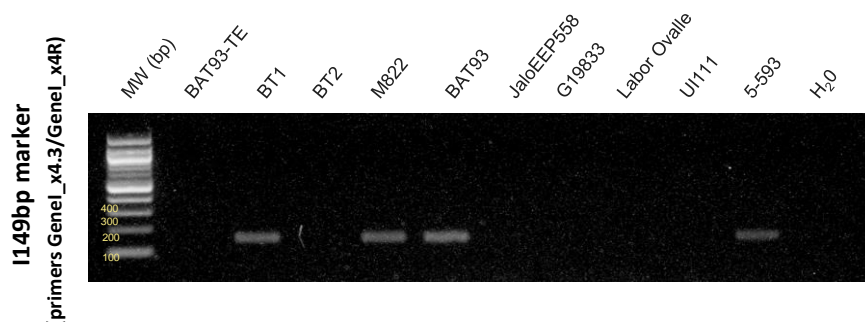

**Supplementary Figure 7. Schematic representation of the *I* gene in BAT93 showing the position of the primers used in this study and the “1149bp” PCR-based marker specific of the *I* gene**

**a**, Schematic representation of the *I* gene in BAT93-TE. The position of the primers used for transcriptional analysis and genotyping of the *I* gene and Retand *I* are indicated with red arrows. **b**, PCR-based marker specific of the *I* gene, referred to as “1149bp” using primers Gene1\_x4.3F / Gene1\_x4R. Whereas amplification of a 149 bp product is detected in the BAT93 and in the EMS BAT93-M822 mutant, no amplicon is detected in the mutant BAT93-TE due to the TE insertion, testifying that this marker is specific of the *I* gene and doesn’t amplify any of the remaining BAT93 31 TNL. As expected, *I* gene is also detected in 5-593 and BT1 (Black Turtle1) (corresponding to *II* genotypes), whereas it is absent in BT2 (Black Turtle 2), JaloEEP558, G19833, Labor Ovalle and UI111 (corresponding to *ii* genotypes).

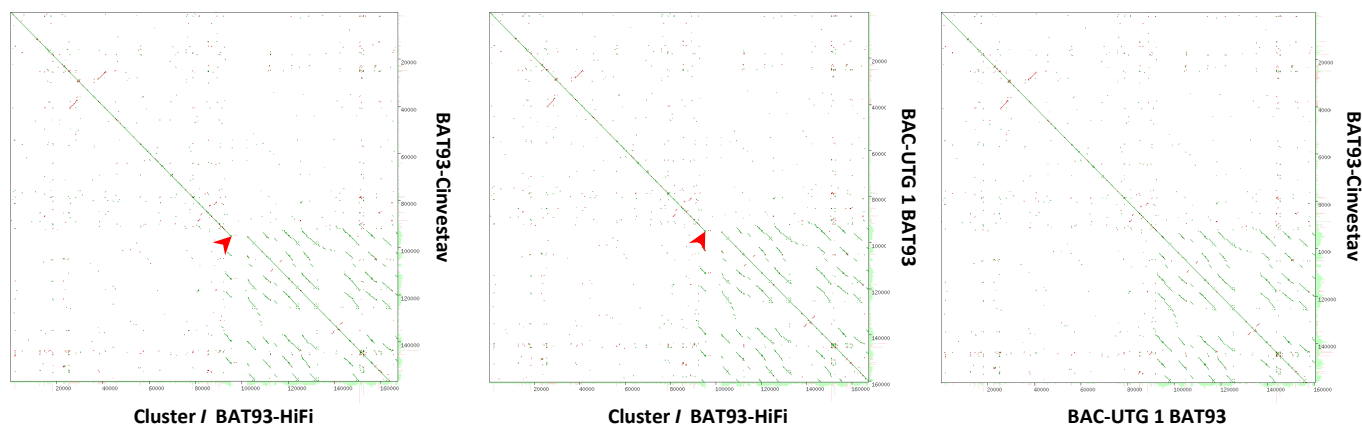

### Supplementary Figure 8. Dot plot-based syntenic comparison of the / cluster region in different sequences of BAT93

Nucleotide sequences BAT93-HiFi, BAT93-Cinvestav assemblies and the BAC sequence UTG1 corresponding to the / cluster were extracted and compared by dot plot. Red arrowhead shows the TE insertion site present only in the BAT93-HiFi assembly.



**BAT93-WT****BAT93-TE****BAT93-M822****Mock**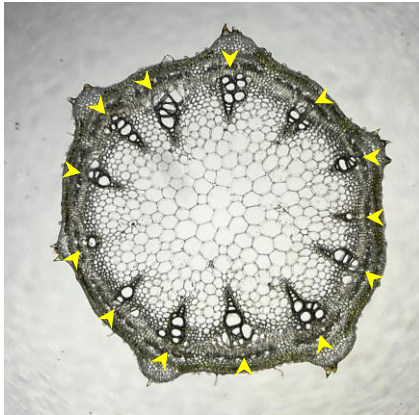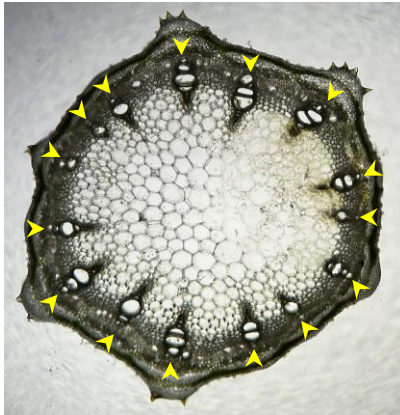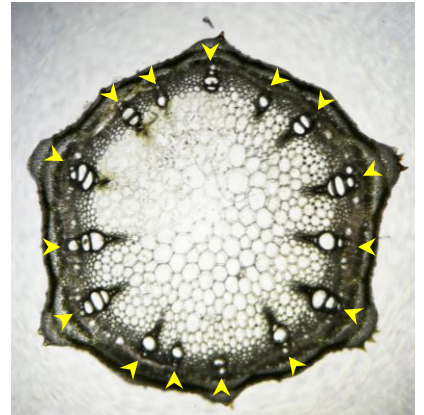**BCMNV-NL3**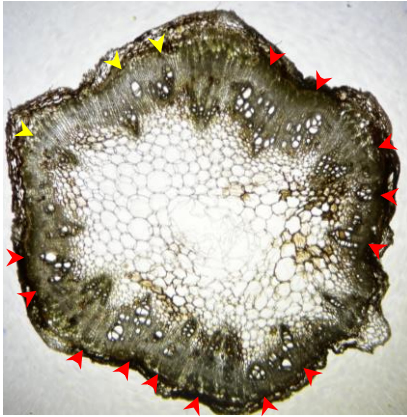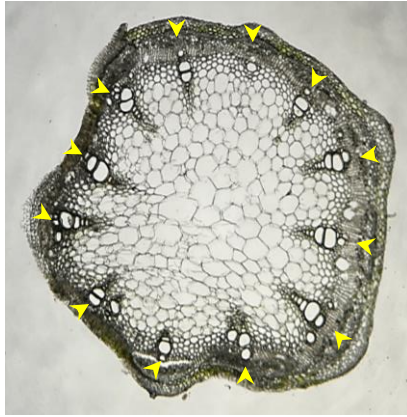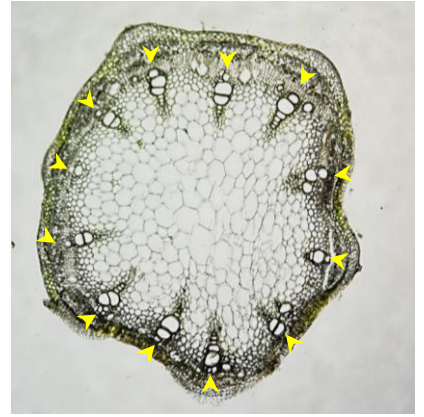

**Supplementary Figure 9. Transversal stem cut from BAT93-WT and mutant plants infected with BCMNV-NL3 at 17 days post-inoculation**

Transversal cuts were performed in the stem portion below the primary leaves by using vibratome steel blades. Yellow and red arrowheads indicate healthy and necrotic phloem tissues, respectively.

## BCMV-US-6

BAT93-WT

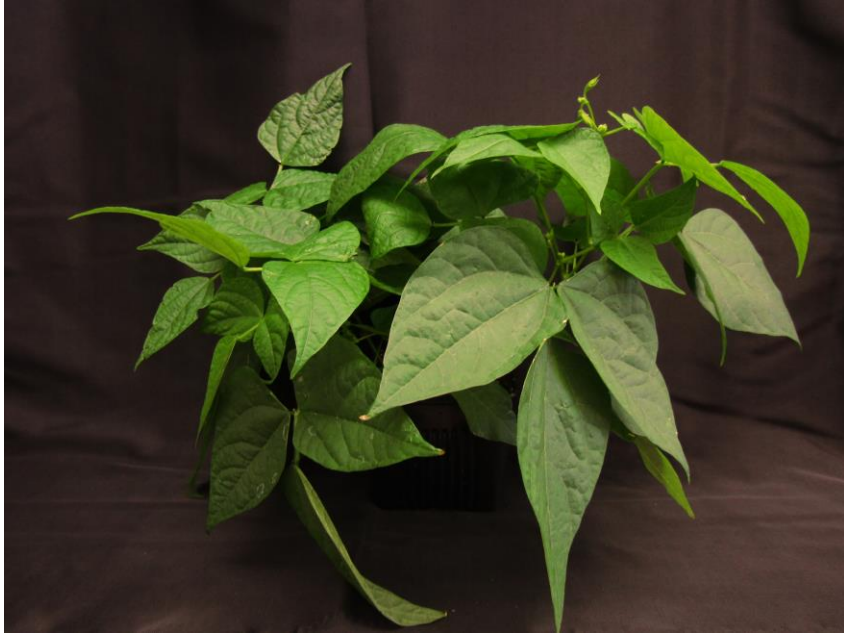

BAT93-TE

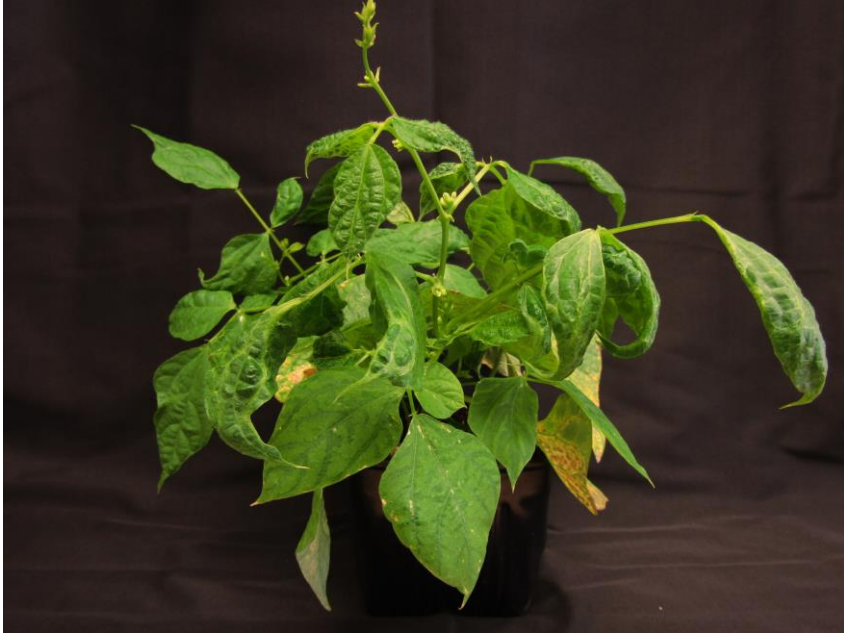

BAT93-M822

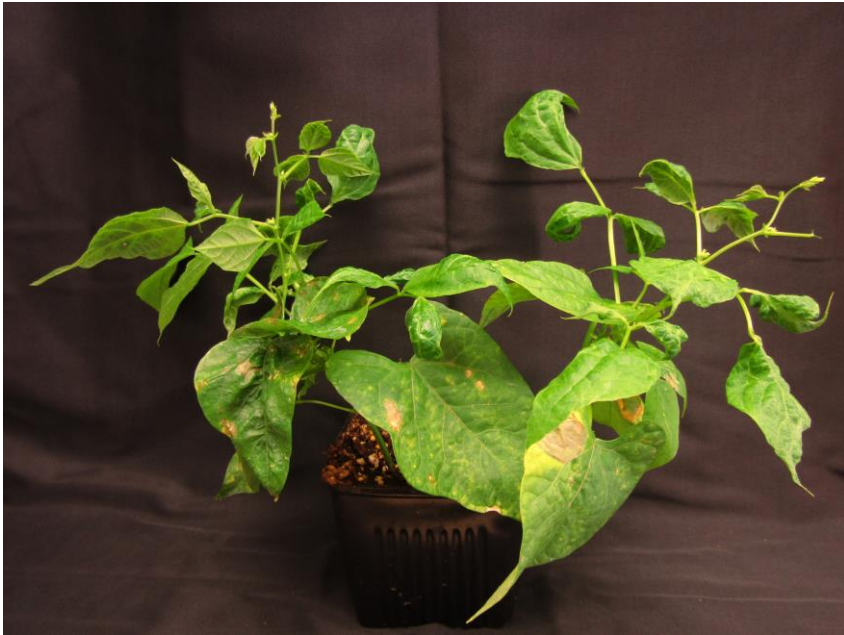

### **Supplementary Figure 10. Phenotypes of infection with BCMV-US-6 in BAT93-WT and mutants**

Observed phenotypes on complete plants from BAT93-WT and mutants at 21 days post-inoculation with BCMV strain US-6. Whereas no phenotype is visible on systemic leaves from BAT93-WT after BCMV infection, BAT93-TE and BAT93-M822 both present mosaic and crinkling symptoms on the trifoliate systemic leaves at 21 days post-inoculation with BCMNV strain US-6.



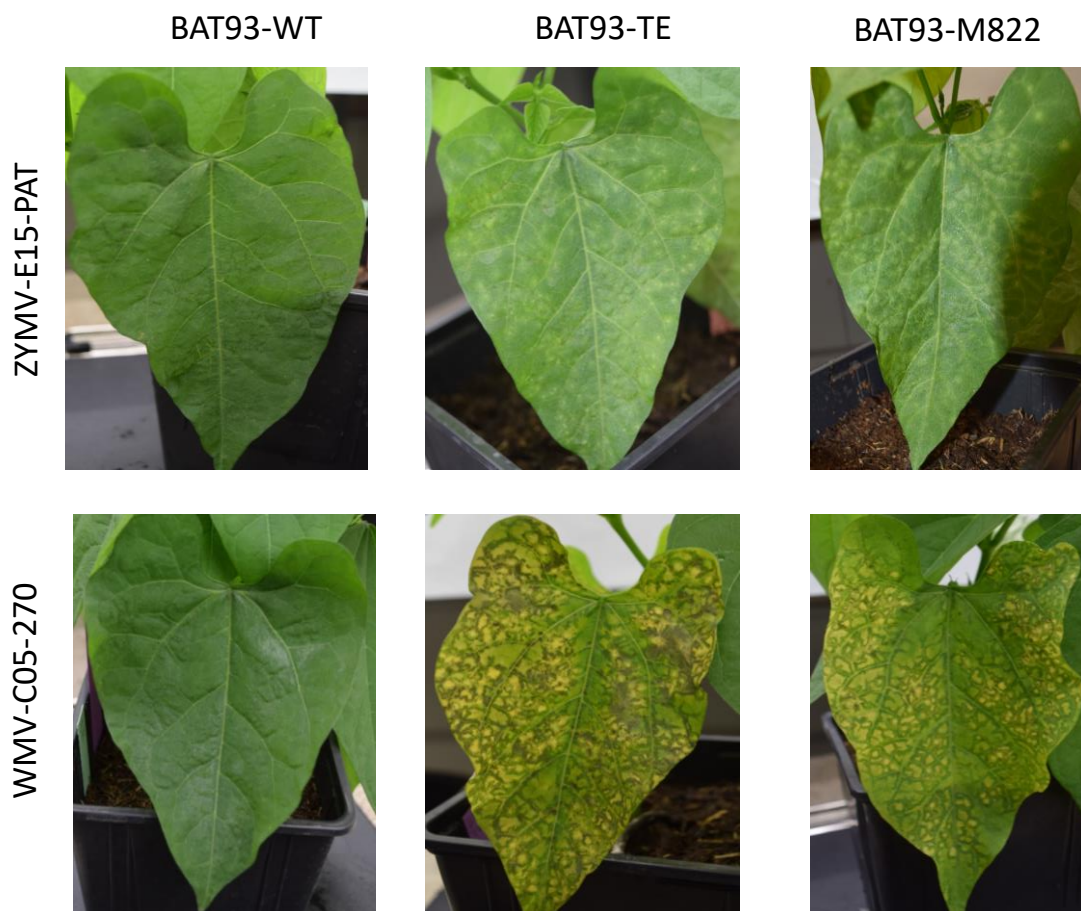

**Supplementary Figure 11. Infection of BAT93 wild-type (WT) and BAT93 mutants (BAT93-TE and BAT93-M822) by ZYMV-E15-PAT and WMV-C05-270**

Primary leaves of common bean BAT93-WT, BAT93-TE and BAT93-M822, three weeks after mechanical inoculation with ZYMV-E15-PAT (top) and WMV-C05-270 (bottom). Inoculated leaves of BAT93 presented no symptoms (extreme resistance) after inoculation with ZYMV-E15-PAT or WMV-C05-270. On the contrary, both / mutants (BAT93-TE and BAT93-M822) presented either mosaic symptoms (ZYMV-E15-PAT) or chloronecrotic lesions (WMV-C05-270) on the inoculated leaves. The upper uninoculated leaves of all plants were all asymptomatic for ZYMV; for WMV, in the second assay, chloronecrotic areas were observed in the first uninoculated trifoliate leaves of BAT93-TE and BAT93-M822 (data not shown).

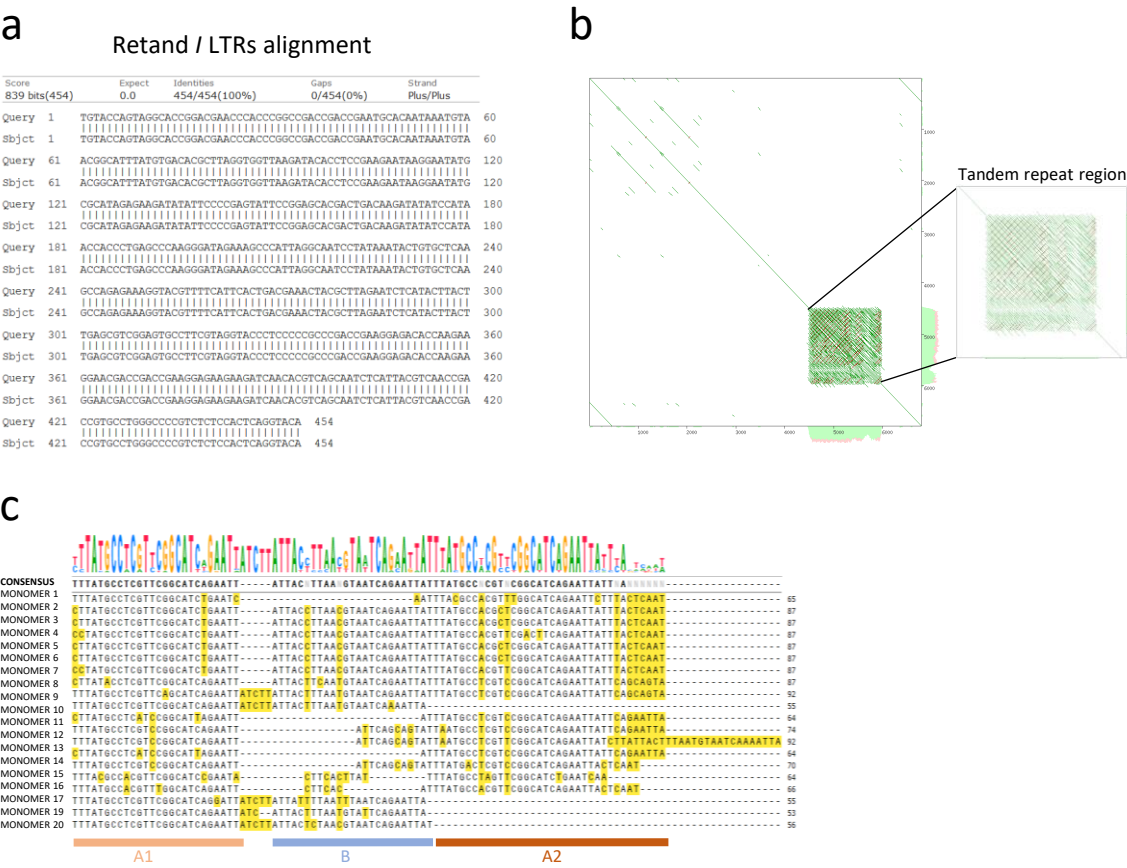

**Supplementary Figure 12. Characterization of Retand / repetitions**

**a**, Sequence alignment of LTRs in the Retand / retrotransposon. **b**, Dot plot representation of the nucleotide sequence of Retand / I. **c**, Multiple alignment of 20 identified monomers of the tandem repeat array. Gaps in the alignment are indicated by dashes; nucleotides that differ from prevalent bases of the consensus are highlighted in yellow and sub-repeats of tandem repeat monomers are indicated on the bottom.

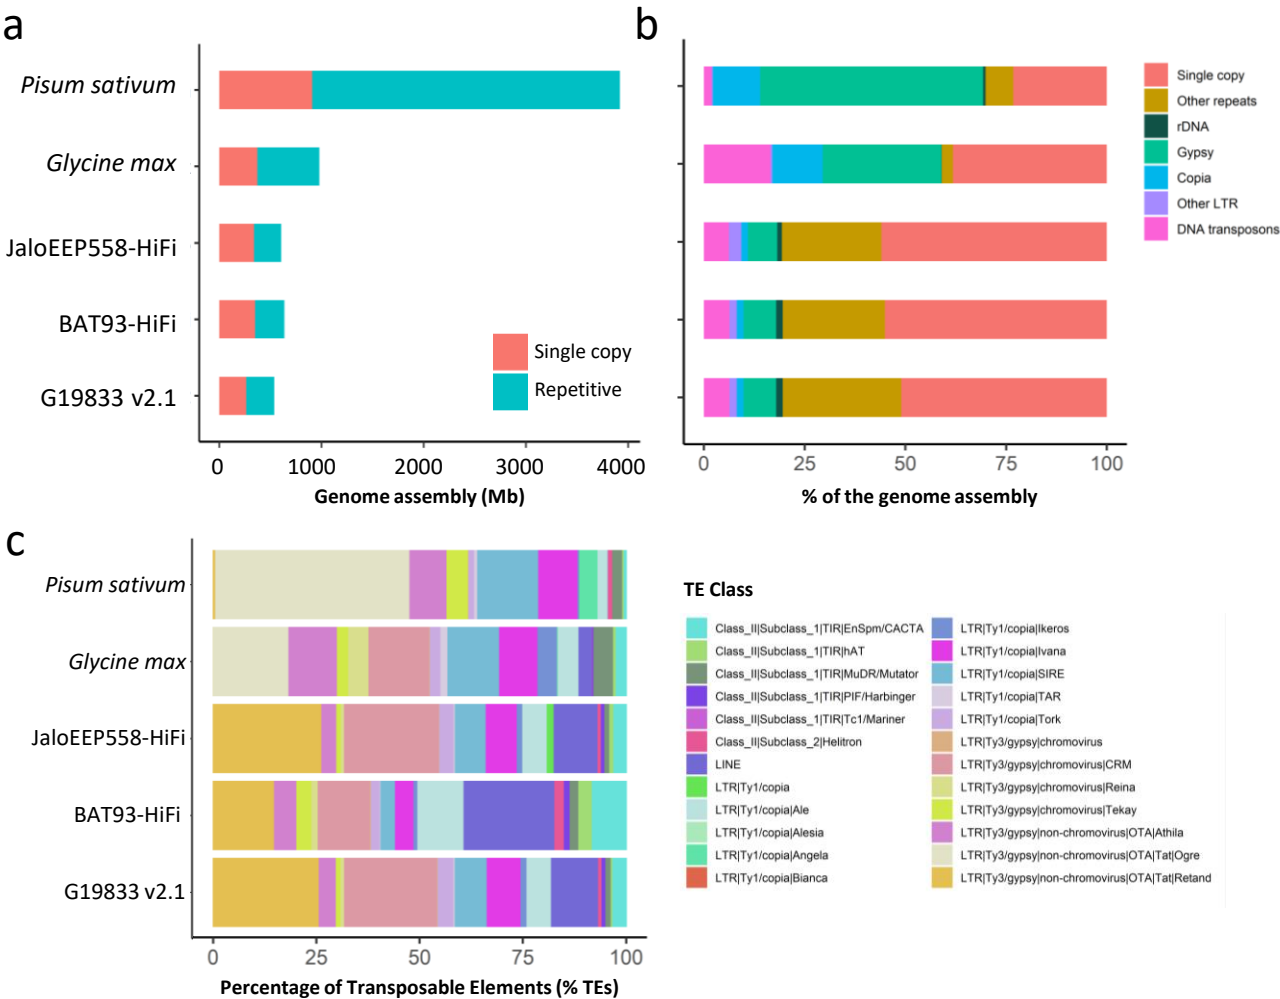

**Supplementary Figure 13. Repetitive sequence composition in *P. vulgaris* genome assemblies compared with other legume genomes. a**, Single copy and repeated sequence content in different genome assemblies of legume species. **b**, Proportion of single copy and repeated sequences for the different classes of repeats. **c**, Summary of the *P. vulgaris*, soybean and pea transposable elements composition by family.

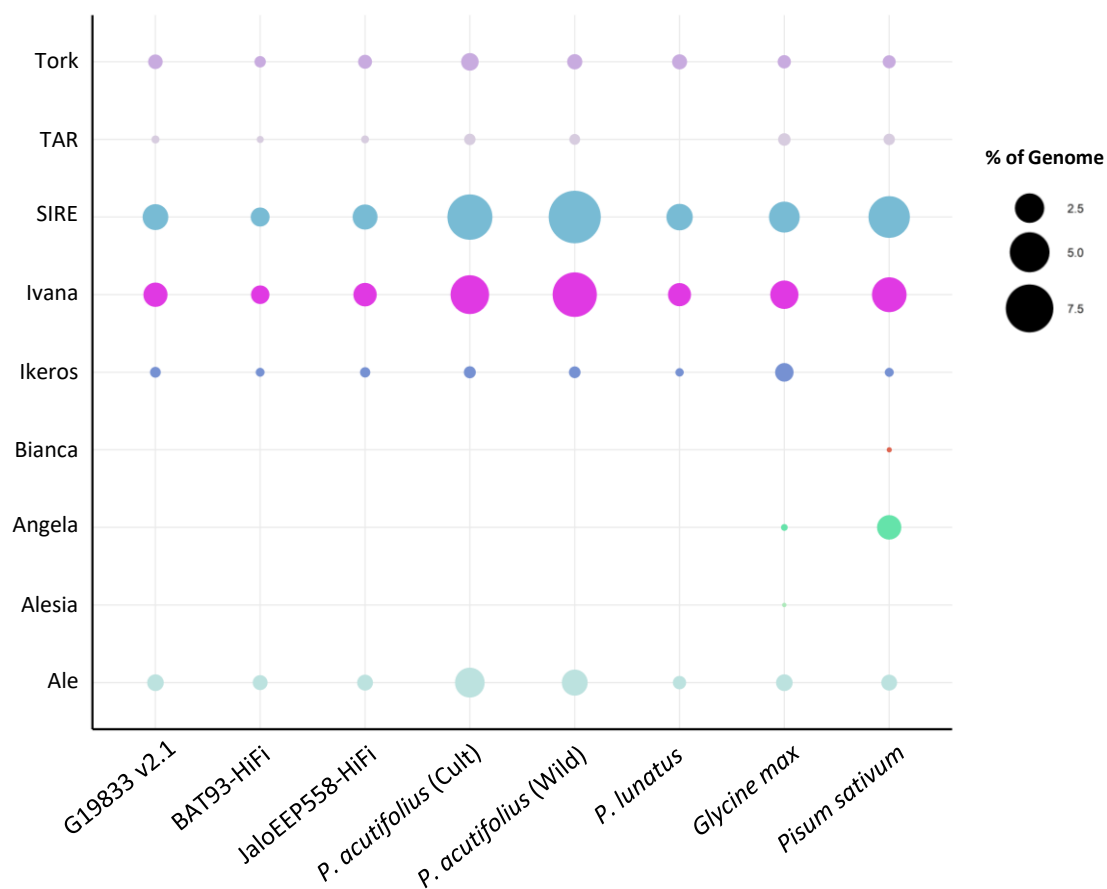

**Supplementary Figure 14. Percentage of the genome occupied by the different Copia TE families in different legume genome assemblies**

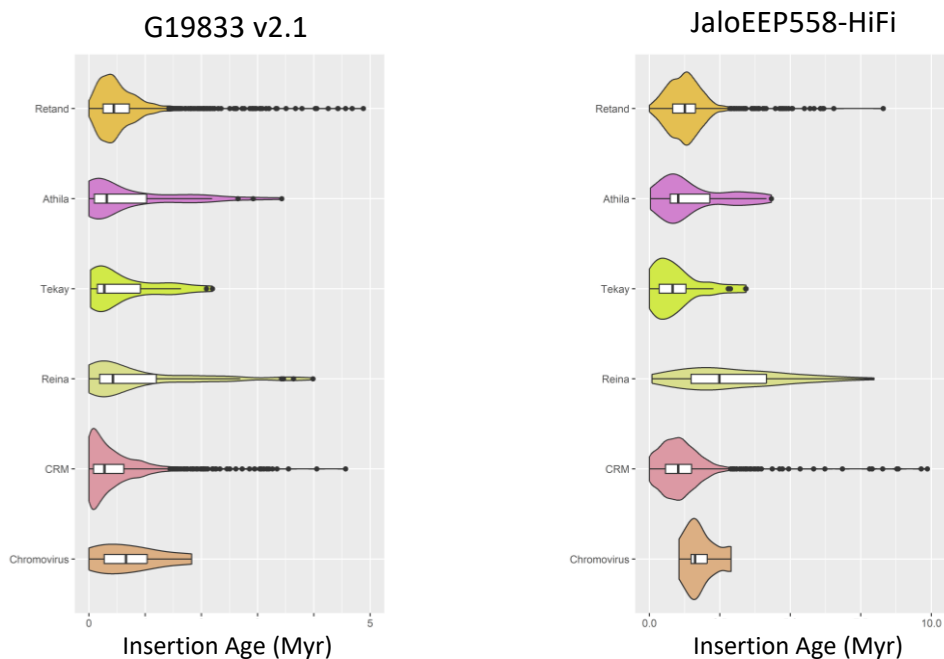

**Supplementary Figure 15. Age distribution of full-length element long terminal repeat-retrotransposon (LTR-RT) Gypsy families in the G19833 v2.1 and JaloEEP558-HiFi genome assemblies**



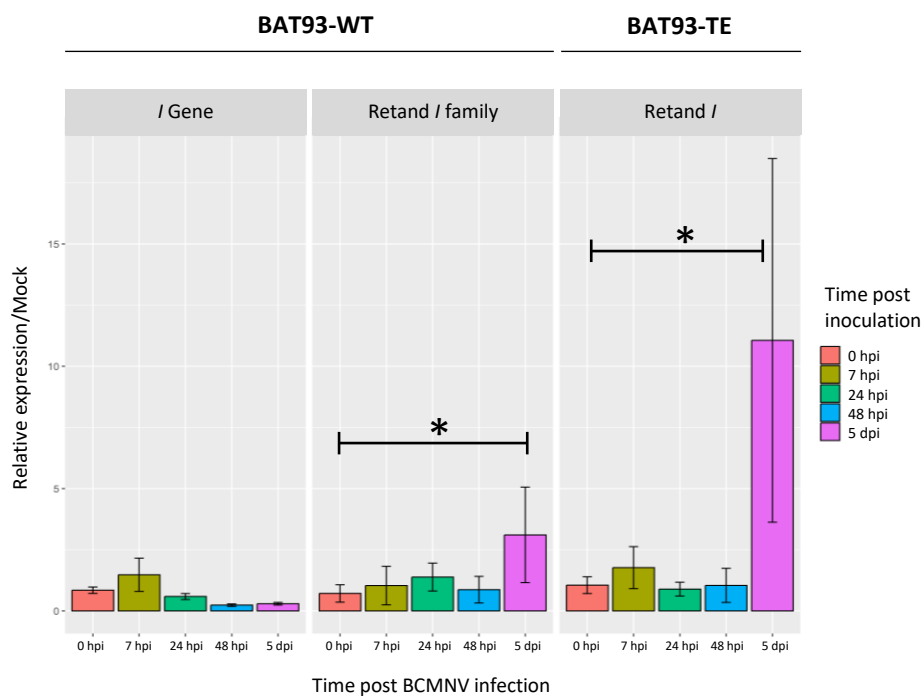

### Supplementary Figure 16. Expression of the *I* gene and Retand elements in response to biotic stress (BCMNV infection)

Relative expression level of *I* gene, Retand *I* family, and the Retand *I* in BAT93-WT and BAT93-TE at different times after BCMNV infection. Data are mean  $\pm$  s.d. ( $n = 3$  independent samples, three independent experiments). Comparison between treatments was performed using the non-parametric Wilcoxon-Mann-Whitney U-test. Asterisks indicate the level of significance: \*  $p < 0.05$ , \*\*  $p < 0.01$  and \*\*\*  $p < 0.001$ .

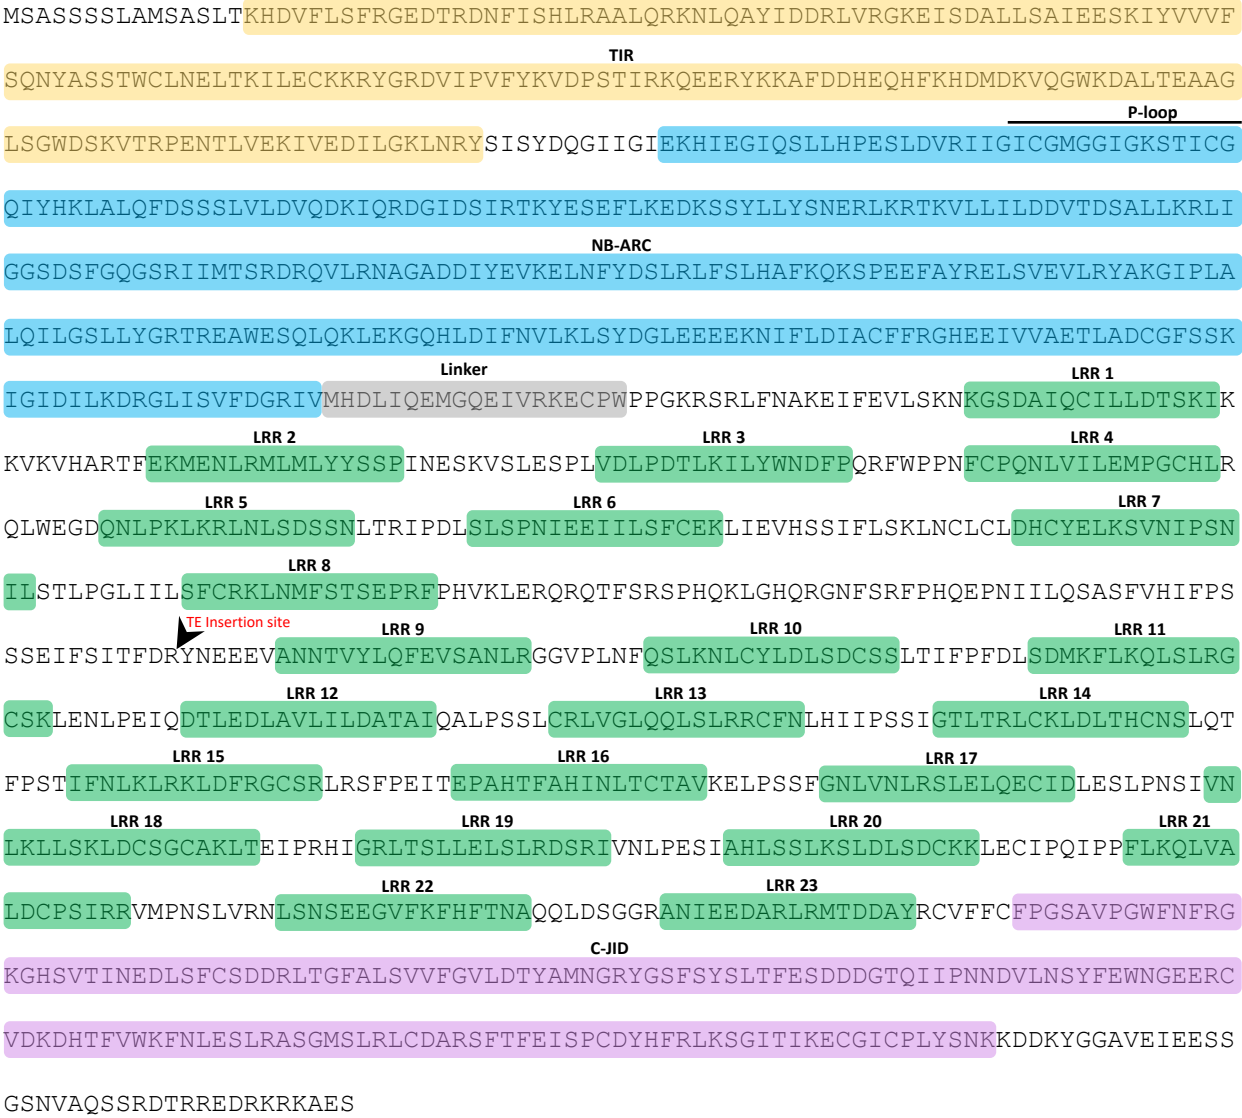

**Supplementary Figure 17. Sequence analysis of the protein encoded by / gene in BAT93-WT**  
Each protein domain is shaded in different colors: TIR domain (yellow), NB-ARC domain (blue), Linker domain (grey), LRR domain (green) and C-JID domain (purple). Black arrowhead indicates the TE insertion site in the corresponding DNA sequence in the BAT93-HiFi assembly.

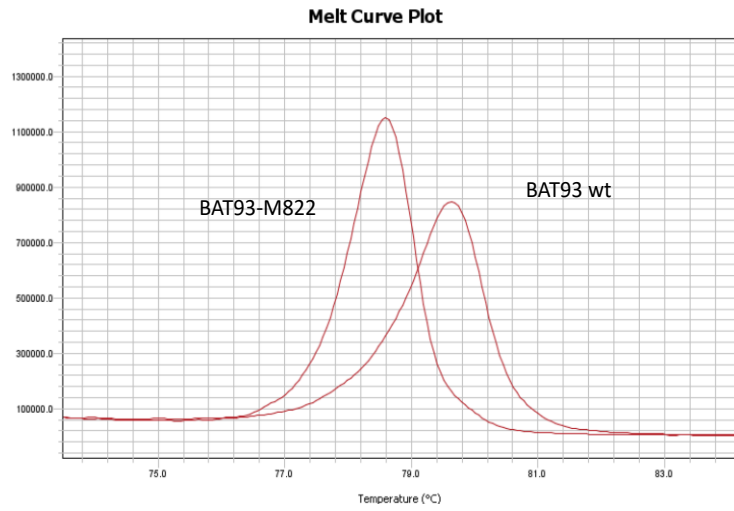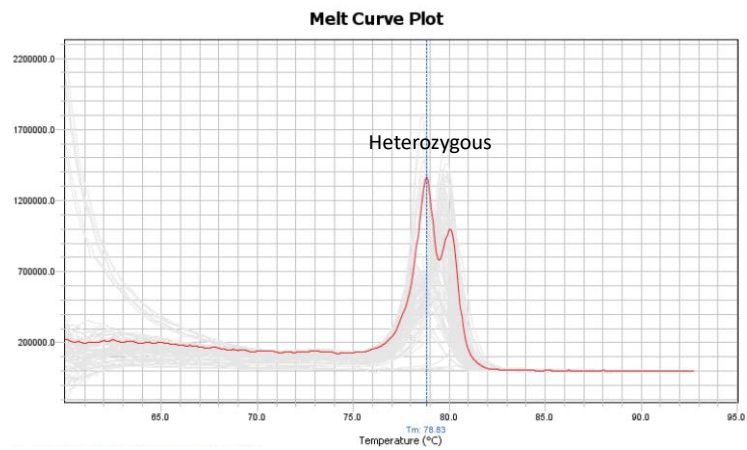

**Supplementary Figure 18. Melting curve analysis of the splice acceptor variant identified in the *I* candidate gene from BAT93-M822 mutant, genotyped by the T<sub>m</sub>-shift method**
