# Supplementary material for: Cloning of the I gene reveals a dynamic NLR cluster conferring durable and broad-spectrum potyvirus resistance in common bean
Source: Research Square preprint supplement (doi:10.21203/rs.3.rs-7216335/v1), 2025-07-30
Supplement: Supplementary file 2 [file e320224a933dd26e40a167ed.docx]

**Supplementary Data 1 - Retand elements used to complete the *Phaseolus vulgaris* TE database provided by Gao et al.** (2014).

>Retand_geneI

ATATCTGTACCAGTAGGCACCGGACGAACCCACCCGGCCGACCGACCGAATGCACAATAAATGTAACGGCATTTATGTGACACGCTTAGGTGGTTAAGATACACCTCCGAAGAATAAGGAATATGCGCATAGAGAAGATATATTCCCCGAGTATTCCGGAGCACGACTGACAAGATATATCCATAACCACCCTGAGCCCAAGGGATAGAAAGCCCATTAGGCAATCCTATAAATACTGTGCTCAAGCCAGAGAAAGGTACGTTTTCATTCACTGACGAAACTACGCTTAGAATCTCATACTTACTTGAGCGTCGGAGTGCCTTCGTAGGTACCCTCCCCCGCCCGACCGAAGGAGACACCAAGAAGGAACGACCGACCGAAGGAGAAGAAGATCAACACGTCAGCAATCTCATTACGTCAACCGACCGTGCCTGGGCCCCGTCTCTCCACTCAGGTACAATTGGCGCCCACCGTGGGGCCGAGGCAAATCTTCAATAATGGTTGCAACAAGAAACAACAACGACGCTATGGCAGAACAGATGACTATGATCCAAACCCTCCAAACTCAGATGGAGGAACTGCGGCAAAAGGGGATGGAAGACCGCCGCCAACACGAAGACGATAGACGCCGCCAAGAGGAGGAAATCGCCTTATTGAGAGAGCAGAATGCGCGACTCCAGCGACAGGTCGATAATCCCGAACGAGAAGGACAATCCCATACGGCCGACCGGACCGCCTCTCTCATACCAACACCGGCCGACACCAATCCTGCTTCCAGAACTGAAACAGTCGAAAGAAAGTCAAGTAAAAGAGGTCATCCTTTTACAGAAGAAATCATCACCACCCCACTTCCAGACAAATGGAGAGGCCTCGTCATTAAGCTCTATGACGGCTCGACCGACCCGGACGAACACTTAAATGTCTACAAGACGCAAATGACTTTGTATACCACAGATAACAATGTGTGGTGTAAAGTATTTCCCACGTCGCTCCAGGGAGAACCCCTTACCTGGTTCACAGAGCTGCCTCCAAACTCCATTAACGATTTTGACATCCTAGCCGCAAAATTCTCCACTCAATATGCCACTAGCCGACCGCATCACATGTCCTCCATGTCTCTCCTAGCGGTACAACAAGAAAAAGGTGAATCTCTTAGAACCTTTCTAGATAGGTTCAACAAAGCATGCATGAACATCCGAGGGCTCAAACAAGAGGTTGCATTGCACCATTTGGTCTCAGCCATCCGACCGAGCCGTTTCACTGAAAGTCTCATCAAGAAACCACCTCAAGACATGGAGGACCTTCGAACTCGAGCAACCAAATTCATGCAAATCGAAGAACACATTGGCGCCCACCGTGGGGCCGAGGCAAATCTTCAATAATGGTTGCAACAAGAAACAACAACGACGCTATGGCAGAACAGATGACTATGATCCAAACCCTCCAAACTCAGATGGAGGAACTGCGGCAAAAGGGGATGGAAGACCGCCGCCAACACGAAGACGATAGACGCCGCCAAGAGGAGGAAATCGCCTTATTGAGAGAGCAGAATGCGCGACTCCAGCGACAGGTCGATAATCCCGAACGAGAAGGACAATCCCATACGGCCGACCGGACCGCCTCTCTCATACCAACACCGGCCGACACCAATCCTGCTTCCAGAACTGAAACAGTCGAAAGAAAGTCAAGTAAAAGAGGTCATCCTTTTACAGAAGAAATCATCACCACCCCACTTCCAGACAAATGGAGAGGCCTCGTCATTAAGCTCTATGACGGCTCGACCGACCCGGACGAACACTTAAATGTCTACAAGACGCAAATGACTTTGTATACCACAGATAACAATGTGTGGTGTAAAGTATTTCCCACGTCGCTCCAGGGAGAACCCCTTACCTGGTTCACAGAGCTGCCTCCAAACTCCATTAACGATTTTGACATCCTAGCCGCAAAATTCTCCACTCAATATGCCACTAGCCGACCGCATCACATGTCCTCCATGTCTCTCCTAGCGGTACAACAAGAAAAAGGTGAATCTCTTAGAACCTTTCTAGATAGGTTCAACAAAGCATGCATGAACATCCGAGGGCTCAAACAAGAGGTTGCATTGCACCATTTGGTCTCAGCCATCCGACCGAGCCGTTTCACTGAAAGTCTCATCAAGAAACCACCTCAAGACATGGAGGACCTTCGAACTCGAGCAACCAAATTCATGCAAATCGAAGAACACATTGACTACCATCAACGATTCAAAGCTGTCGGATTCGGAGCCCTTAAAGACCAAACTCAAAGTAAAGAAAGAGAAGTCGAAACCGAACGAACCGTCCGAACCACTCTGAGGTCCGACCGGAGTAGGGGAGGCCGAGTCCCCAGGTTTAACAGTTACACCCCTTTAACTGTGCCGAGGGGACGAGCCCTAGATGAAGCACTACAAACGGACCTAATCCCGACATTGAAGCAGTATCAAACACCACCAAATGCAGATACTGCTAAGCGTTGTCAATACCATCAGAATTTCGGTCACACGACCGAAGGGTGTCAAGCTTTGAAAGATAAAATTGAAGAACTCATCCAAGCTGGCCATTTGCGGCAGTTCGTCAAGAGGACAAGGAGTTCAAGATCCCCACCACGGAATACCGACCGTCCGTACCGTAACGATTACAAACGCCACACTGACCGTAGCCAGACTTCGCGAAAACGCAGCGAAAGCCCCGTTCGGCGTACACGCGCTCGTAGCACAAGTCCCGACCGAAGCGCCCGACCCCGCCAACGAGTCCGCGAAGTCATCAACATGATTGCTGGACCCGTTAACTTGGGCGAACCGAACCACGAAACAAATTATATCGCTGGGGGATTTGCCGGTGGCGGATGCTCAAATTCCGCCCGAAAGAAACATCTCCGTGACATCCAGTCCGCTCATGGTACCACGAGGAGGCGTCCACATATACCTCCGATTACTTTCACTGACGAAGACTTTACAGCCATAGATCCAGCCCAGGACGACCCCATGGTCATCACTGTAGAAATTGACAAGTTCGCAATTGCCAAAACTTTGGTAGATCAGGGTAGCTCGGTCGACATATTATATTGGGACATTTTCAAGAAAATGCGCATCCCAGAAGCACATATTCAGCCCTATAACGAACAAATTGTAGGATTCTCAGGTGAACGGGTCGATACTAAGGGGTACATAGACCTGTACACAACCTTTGGTGAGGAAGACGGCCTCCATAAAACAATAAACGTACGATACCTCCTGGTTAACGCACAAACTTCCTACAACATCCTGCTCGGCCGTCCGTCCATTAACAGATTAAAAGCCATTGTGTCCACTCCACACTTAGCCATGAAATTCCCCTCGGCTAACAACGACATTGCAACAATCCATGTCGACCAAAAAACCGCTAGAGAATGTTATGTGGCAAGTCTGAAAAGTGAACCAACTAGACGACTCTACACGACCAATCCGGACGACCGAATGCCGCAAAAAAGAGGACGATCCCCGACACGATATTCCGGACGGCGCATGTTCAATCGGCAAATGATAGCCCTTGTCGATCTCGACCCTCGTATGGACGATCCCCGTATGGAGGCAGGAGAAGACTTGCAGGCGTTCCCACTTCGCGACGACCGTCACATTACACATGTTGGCACCTCATTGAAGCCGGACGACCGAATGGCCATTGGCACGACACTTGTCAAAAATGCCGATCTATTCGCATGGACGGCCGCTGACATGCCTGGCGTAGATCCACAGGTCATCACACACCGATTATCACTATATAAAGAGGCTAGACCGATAGCTCAAAAGAAAAGACATCTAGGCGAGGAACGACGCCAAGCCGCACGTGACGAAACCAACAAATTGCTACAAGCTGGATTCATTCGGAAGGCCCGTTACACCACATGGCTAGCCAACGTGGTTATGGTAACGAAAGCGAACGGAAAATGGCGAATGTGTGTTGACTACACGGACCTCAATAAGGCATGCCCAAATGCCAAGAGACTGATTCCGGTAATTTCTATTATGAAGTTATGCCCTTCGGACTCAAGAACGCCGGGGCCACTTACCAAAGACTAATGGACCATGTATTCCACGACATGATCGGTAGGAATGTCGAAGTCTATGTCGATGACATCGTCGTCAAGTCAGACTCATGCAAACAGCATATTGCCGACCTGAAAGAAGTTTTTCAGGCCCTCCGCCAACACCAGATGCGACTCAATCCTGACAAATGCGCGTTCGGCGTCGAGGGGGGGAAGTTCTTAGGTTTTATGCTAACTCATAGAGGCATAGAAGCTAACCCCGAGAAATGTAGAGCTATCTCCGAAATGAGAAGTCCCAAATCCATTCAGGAAATTCAGAGACTTATCGGCCGACTCACCGCATTGTCCAGATTCGTTCCTAAATTAGCCGAACGAACCAGACCCATTGTCCGACTACTGAAAAAAGCATCGCGCTTTGAGTAACGAGGCACATCTATTCCTTTTATTACTCAACTTTATGCCTCGTTCGGCATCTGAATCAATTTACGCCACGTTTGGCATCAGAATTCTTTACTCAATCTTATGCCTCGTTCGGCATCTGAATTATTACCTTAACGTAATCAGAATTATTTATGCCACGCTCGGCATCAGAATTATTTACTCAATCTTATGCCTCGTTCGGCATCTGAATTATTACCTTAACGTAATCAGAATTATTTATGCCACGCTCGGCATCAGAATTATTTACTCAATCCTATGCCTCGTTCGGCATCTGAATTATTACCTTAACGTAATCAGAATTATTTATGCCACGTTCGACTTCAGAATTATTTACTCAATCTTATGCCTCGTTCGGCATCTGAATTATTACCTTAACGTAATCAGAATTATTTATGCCACGCTCGGCATCAGAATTATTTACTCAATCTTATGCCTCGTTCGGCATCTGAATTATTACCTTAACGTAATCAGAATTATTTATGCCACGCTCGGCATCAGAATTATTTACTCAATCCTATGCCTCGTTCGGCATCTGAATTATTACCTTAACGTAATCAGAATTATTTATGCCACGTTCGGCATCAGAATTATTTACTCAATCTTATACCTCGTTCGGCATCAGAATTATTACTTCAATGTAATCAGAATTATTTATGCCTCGTCCGGCATCAGAATTATTCAGCAGTATTTATGCCTCGTTCAGCATCAGAATTATCTTATTACTTTAATGTAATCAGAATTATTTATGCCTCGTCCGGCATCAGAATTATTCAGCAGTATTTATGCCTCGTTCGGCATCAGAATTATCTTATTACTTTAATGTAATCAAAATTACTTATGCCTCATCCGGCATTAGAATTATTTATGCCTCGTCCGGCATCAGAATTATTCAGAATTATTTATGCCTCGTCCGGCATCAGAATTATTCAGCAGTATTAATGCCTCGTCCGGCATCAGAATTATTCAGAATTATTTATGCCTCGTCCGGCATCAGAATTATTCAGCAGTATTAATGCCTCGTTCGGCATCAGAATTATCTTATTACTTTAATGTAATCAAAATTACTTATGCCTCATCCGGCATTAGAATTATTTATGCCTCGTCCGGCATCAGAATTATTCAGAATTATTTATGCCTCGTCCGGCATCAGAATTATTCAGCAGTATTTATGACTCGTCCGGCATCAGAATTACTCAATTTTACGCCACGTTCGGCATCCGAATACTTCACTTATTTTATGCCTAGTTCGGCATCTGAATCAATTTATGCCACGTTTGGCATCAGAATTCTTCACATTTATGCCACGTTCGGCATCAGAATTACTCAATTTTATGCCTCGTTCGGCATCAGGATTATCTTATTATTTTAATTTAATCAGAATTATTTATGCCTCGTTCGGCATCAGAATTATCATTACTTTAATGTATTCAGAATTATTTATGCCTCGTTCGGCATCAGAATTATCTTATTACTCTAACGTAATCAGAATTATCTATGCAAGTGTGTATTGCCCACATGTCAGGTCCAGCAATTTTCTACGGCACTTTGTTCATTAACTATTCAGAAGAGGCGTTCGGCTGTGGGCCAGGGGTCTCCGCCTCGACCTCCTCACCTAAATTATCATCGCGGTTGGCCGGCACCAGCTTTCCATCAACTACTATTTTTTCTGTCGTACCGATCGCCCGCCCGGGGTACTCCATTCAGGCAGGCCGCTTGTCCGATGCCTAACCGAAATTATTTTTCGTTAATCCGAACGTCCCGTCGTTCCGTTAAATTTAATGTCTGACAACTCGAGAGGCACAACAATCATTACGACTCTTCGGCTTTTATTCACCTCGAGCCTGGGGGGCAAGTGTACCAGTAGGCACCGGACGAACCCACCCGGCCGACCGACCGAATGCACAATAAATGTAACGGCATTTATGTGACACGCTTAGGTGGTTAAGATACACCTCCGAAGAATAAGGAATATGCGCATAGAGAAGATATATTCCCCGAGTATTCCGGAGCACGACTGACAAGATATATCCATAACCACCCTGAGCCCAAGGGATAGAAAGCCCATTAGGCAATCCTATAAATACTGTGCTCAAGCCAGAGAAAGGTACGTTTTCATTCACTGACGAAACTACGCTTAGAATCTCATACTTACTTGAGCGTCGGAGTGCCTTCGTAGGTACCCTCCCCCGCCCGACCGAAGGAGACACCAAGAAGGAACGACCGACCGAAGGAGAAGAAGATCAACACGTCAGCAATCTCATTACGTCAACCGACCGTGCCTGGGCCCCGTCTCTCCACTCAGGTACAATATC

>chr4_4516753-4513608_BAT93

TGTACCAGTAGGCACCGGACGAACCCACCCGGCCGACCGACCGAATGCACAATAAATGTAACGGCATTTATGTGACACGCTTAGGTGGTTAAGATACACCTCCGAAGAATAAGGAATATGCGCATAGAGAAGATATATTCCCCGGGTATTCCGGAGCACGACTGACAAGATATATCCATAACCACCCTGAGCCCAAGGGATAGAAAGCCCATTAGGCAATCCTATAAATACTGTGCTCAAGCCAGAGAAAGGTACGTTTTCATTCACTGACGAAACTACGCTTAGAATCTCATACTTACTTGAGCGTCGGAGTGCCTTCGCAGGTACCCTCCCCCGCCCGACCGAAGGAGACACCAAGAAGGAACGACCGACCGAAGGAGAAGAAGATCAACACGTCAGCAATCTCATTACGTCAACCGACCGTGCCTGGGCCCCGTCTCTCCACTCAGGTACAATTGGCGCCCACCGTGGGGCCGAGGCAAATCTTCAATAATGGTTGCAACAAGAAACAACAACGACGCTATGGCAGAACAGATGACTATGATCCAAACCCTCCAAACTCAGATGGAGGAACTGCGGCAAAAGGGGATGGAAGACCGCCGCCAACACGAAGACGATAGACGCCGCCAAGAGGAGGAAATCGCCTTATTGAGAGAGCAGAATGCGCGACTCCAGCGACAGGTCGATAATCCCGAACGAGAAGGACAATCCCATACGGCCGACCGGACCGCCTCTCTCATACCAACACCGGCCGACACCAATCCTGCTTCCAGAACTGAAACAGTCGAAAGAAAGTCAAGTAAAAGAGGTCATCCTTTTACAGAAGAAATCATCACCACCCCACTTCCAGACAAATGGAGAGGCCTCGTCATTAAGCTCTATGACGGCTCGACCGACCCGGACGAACACTTAAATGTCTACAAGACGCAAATGACTTTGTATACCACAGATAACAATGTGTGGTGTAAAGTATTTCCCACGTCGCTCCAGGGAGAACCCCTTACCTGGTTCACAGAGCTGCCTCCAAACTCCATTAACGATTTTGACATCCTAGCCGCAAAATTCTCCACTCAATATGCCACTAGCCGACCGCATCACATGTCCTCCATGTCTCTCCTAGCGGTACAACAAGAAAAAGGTGAATCTCTTAGAACCTTTCTAGATAAGTTCAACAAAGCATGCATGAACATCCGAGGGCTCAAACAAGAGGTTGCATTGCACCATTTGGTCTCAGCCATCCGACCGAGCCGTTTCACTGAAAGTCTCATCAAGAAACCACCTCAAGACATGGAGGACCTTCGAACTCGAGCAACCAAATTCATGCAAATCGAAGAACACATTGACTACCATCAACGATTCAAAGCTGTCGGATTCGGAGCCCTTAAAGACCAAACTCAAAGTAAAGAAAGAGAAGTCGAAACCGAACGAACCGTCCGAACCACTCTGAGGTCCGACCGGAGTAGGGGAGGCCGAGTCCCCAGGTTTAACAGTTACACCCCTTTAACTGTGCCGAGGGGACGAGCCCTAGATGAAGCACTACAAACGGACCTAATCCCGACATTGAAGCAGTATCAAACACCACCAAATGCAGATACTGCTAAGCGTTGTCAATACCATCAGAATTTCGGTCACACGACCGAAGGGTGTCAAGCTTTGAAAGATAAAATTGAAGAACTCATCCAAGCTGGCCATTTGCGGCAGTTCGTCAAGAGGACAAGGAGTTCAAGATCCCCACCACGGAATACCGACCGTCCGTCCCGTGGTGCCGACCGGCCGTACCGTAACGATTACAAACGCCACACTGACCGTAGCCAGACTTCGCGAAAACGCAGCGAAAGCCCCGTTCGGCGTACACGCGCTCGTAGCACAAGTCCCGACCGAAGCGCCCGACCCCGCCAACGAGTCCGCGAAGTCATCAACATGATTGCTGGACCCGTTAACTTGGGCGAACCGAACCACGAAACAAATTATATCGCTGGGGGATTTGCCGGTGGCGGATGCTCAAATTCCGCCCGAAAGAAACATCTCCGTGACATCCAGTCCGCTCATGGTACCACGAGGAGGCGTCCACATATACCTCCGATTACTTTCACTGACGAAGACTTTACAGCCATAGATCCAGCCCAGGACGACCCCATGGTCATCACTGTAGAAATTGACAAGTTCGCAATTGCCAAAACTTTGGTAGATCAGGGTAGCTCGGTCGACATATTATATTGGGACATTTTCAAGAAAATGCGCATCCCAGAAGCACATATTCAGCCCTATAACGAACAAATTGTAGGATTCTCAGGTGAACGGGTCGATACTAAGGGGTACATAGACCTGTACACAACCTTTGGTGAGGAAGACGGCCTCCATAAAACAATAAACGTACGATACCTCCTGGTTAACGCACAAACTTCCTACAACATCCTGCTCGGCCGTCCGTCCATTAACAGATTAAAAGCCATTGTGTCCACTCCACACTTAGCCATGAAATTCCCCTCGGCTAACAACGACATTGCAACAATCCATGTCGACCAAAAAACCGCTAGAGAATGTTATGTGGCAAGTCTGAAAAGTGAACCAACTAGACGACTCTACACGACCAATCCGGACGACCGAATACCGCAAAAAAGAGGACGATCCCCGACACGATATTCCGGACGGCGCATGTCCAATCGGCAAATGATAGCCCTTGTCGATCTCGACCCTCGTATGGACGATCCCCGTATGGAGGCAGGAGAAGACTTGCAGGCGTTCCCACTTCGCGACGACCGTCACATTACACATGTTGGCACCTCATTGAAGCCGGACGACCGAATGGCCATTGGCACGACACTTGTCAAAAATGCCGATCTATTCGCATGGACGGCCGCTGACATGCCTGGCGTAGATCCACAGGTCATCACACACCGATTATCACTATATAAAGAGGCTAGACCGATAGCTCAAAAGAAAAGACATCTAGGCGAGGAACGACGCCAAGCCGCACGTGACGAAACCAACAAATTGCTACAAGCTGGATTCATTCGGAAGGCCCGTTACACCACATGGCTAGCCAACGTGGTTATGGTAACGAAAGCGAACGGAAAATGGCGAATGTGTGTTGACTACACGGACCTCAATAAGGCATGCCCAAATGCCAAGAGACTGATTCCGGTAATTTCTATTATGAAGTTATGCCCTTCGGACTCAAGAACGCCGGGGCCACTTACCAAAGACTAATGGACCATGTATTCCACGACATGATCGGTAGGAATGTCGAAGTCTATGTCGATGACATCGTCGTCAAGTCAGACTCATGCAAACAGCATATTGCCGACCTAAAAGAAGTTTTTCAGGCCCTCCGCCAACACCAGATGCGACTCAATCCTGACAAATGCGCGTTCGGCGTCGAGGGGGGGAAGTTCTTAGGTTTTATGCTAACTCATAGAGGCATAGAAGCTAACCCCGAGAAATGTAGAGCTATCTCCGAAATGAGAAGTCCCAAATCCATTCAGGAAATTCAGAGACTTATCGGCCGACTCACCGCATTGTCCAGATTCGTTCCTAAATTAGCCGAACGAACCATACCCATTGTCCGACTACTGAAAAAAGCATCGCGCTTTGAGTGGTCGACCGAATGTGAAGAAATTTTCCTCCATTTGAAAACCTTTTTGTCTTCCCCGCCGGTCATCCAGAAGCCGGACGCCCGGGAGCCCATCATAGTCTATCTTGCCGTTTCCCACGAGGCCGTCAGCTCAGTCTTGGTGCAAGAAATTAATTTCGAGGAACGACCGGTTTACTTCGTCAGCCGCGCCCTTCATGGCGCCGAAATCCGATACCAGACGATCGAAAAGGTAGCCATGGCCCTCATCATTACCGCCCGACGAATGCGCATGTATTTTCAAAATCATCGCATTATTACAGCTGAACTTAATAAAAAGTGCACTCTTTCCTCGCTCGGTCGGTTTTTCCCTAAGGAGGGTTTACGACCGAGAAGGTTTTAACGAGGCACATCTATTCCTTTTATTACTCAACTTTATGCCTCGTTCGGCATCTGAATCAATTTACGCCACGTTTGGCATCAGAATTCTTTACTCAATCTTATGCCTCGTTCGGCATCTGAATTATTACCTTAACGTAATCAGAATTATTTATGCCACGCTCGGCATCAGAATTATTTACTCAATCTTATGCCTCGTTCGGCATCTGAATTATTACCTTAACGTAATCAGAATTATTTATGCCACGCTCGGCATCAGAATTATTTACTCAATCCTATGCCTCGTTCGGCATCTGAATTATTACCTTAACGTAATCAGAATTATTTATGCCACGTTCGACTTCAGAATTATTTACTCAATCCTATGCCTCGTTCGGCATCTGAATTGTTACCTTAACGTAATCAGAATTATTTATGCCACGTTCGGCATCAGAATTATTTACTCAATCCTATGCCTCGTTCGGCATCTGAATTATTACCTTAACGTAATCAGAATTATTTATGCCACGTTCGGCATCAGAATTATTTACTCAATCTTATACCTCGTTCGGCATCAGAATTATTACTTCAATGTAATCAGAATTATTTATGCCTCGTCCGGCATCAGAATTATTCAGCAGTATTTATGCCTCGTTCAGCATCAGAATTATCTTATTACTTTAATGTAATCAGAATTATTTATGCCTCGTCCGGCATCAGAATTATTCAGCAGTATTTATGCCTCGTTCGGCATCAGAATTATCTTATTACTTTAATGTAATCAAAATTACTTATGCCTCATCCGGCATTAGAATTATTTATGCCTCGTCCGGCATCAGAATTATTCAGAATTATTTATGCCTCGTCCGGCATCAGAATTATTCAGCAGTATTAATGCCTCGTCCGGCATCAGAATTATTCAGAATTATTTATGCCTCGTCCGGCATCAGAATTATTCAGCAGTATTAATGCCTCGTTCGGCATCAGAATTATCTTATTACTTTAATGTAATCAAAATTACTTATGCCTCATCCGGCATTAGAATTATTTATGCCTCGTCCGGCATCAGAATTATTCAGAATTATTTATGCCTCGTCCGGCATCAGAATTATTCAGCAGTATTTATGACTCGTCCGGCATCAGAATTACTCAATTTTACGCCACGTTCGGCATCCGAATACTTCACTTATTTTATGCCTAGTTCGGCATCTGAATCAATTTATGCCACGTTTGGCATCAGAATTCTTCACATTTATGCCACGTTCGGCATCAGAATTACTCAATTTTATGCCTCGTTCGGCATCAGGATTATCTTATTATTTTAATGTAATCAGAATTATTTATGCCTCGTTCGGCATCAGAATTATCATTACTTTAATGTATTCAGAATTATTTATGCCTCGTTCGGCATCAGAATTATCTTATTACTCTAACGTAATCAGAATTATCTATGCAAGTGTGTATTGCCCACATGTCAGGTCCAGCAATTTTCTACGGCACTTTGTTCATTAACTATTCAGAAGAGGCGTTCGGCTGTGGGCCAGGGATCTCCGCCTCGACCTCCTCACCTAAATTATCATCGCGGTTGGCCGGCACCAGCTTTCCATCAACTACTATTTTTTCTGTCGTACCGATCGCCCGCCCGGGGTACTCCATTCAGGCAGGCCGCTTGTCCGATGCCTAACCGAAATTATTTTTCGCTAATCCGAACGTCCCGTCGTTCCGTTAAATTTAATGTCTGACAACTCGAGAGGCACAACAATCATTACGACTCTTCGGCTTTTATTCACCTCGAGCCTGGGGGGCAAGTGTACCAGTAGGCACCGGACGAACCCACCCGGCCGACCGACCGAATGCACAATAAATGTAACGGCATTTATGTGACACGCTTAGGTGGTTAAGATACACCTCCGAAGAATAAGGAATATGCGCATAGAGAAGATATATTCCCCGGGTATTCCGGAGCACGACTGACAAGATATATCCATAACCACCCTGAGCCCAAGGGATAGAAAGCCCATTAGGCAATCCTATAAATACTGTGCTCAAGCCAGAGAAAGGTACGTTTTCATTCACTGACGAAACTACGCTTAGAATCTCATACTTACTTGAGCGTCGGAGTGCCTTCGCAGGTACCCTCCCCCGCCCGACCGAAGGAGACACCAAGAAGGAACGACCGACCGAAGGAGAAGAAGATCAACACGTCAGCAATCTCATTACGTCAACCGACCGTGCCTGGGCCCCGTCTCTCCACTCAGGTACA

>chr6_13628122-13635565__BAT93

CGAACGCACGTTCCGACCGGCCGTATACACAATAAATGTAAGGGCATTTATGTGACAAGCTAAGGTGGTTAAGATACACCTCCGAAGAATAAGGAATATGCGTTTAGAGAAGATATGTTCCCCGGGTATTCCGGAGCACGACTGACAAGACATATCCATAACCACCCTGAGCCCAAGGGATAGAAAGCCCATTAGGCAATCCTATAAATACTGTGCTCAAGCCAGAGAAAGGTACGTTTTCATTCACTTACGAAACTGCGCTTAGAATCTCATACTTACTTGAGCGTCGGAGTGCCTTCGCAGGTACCCTCCCCCGCCCGACCGAAGTGGATAGCACGAAGGGACGACCGACCAAAGGAGACAGCAAGAAAGGACAATCGACCAGAGGAGAAGAAGATCAACACGTCAGCAATTACACCACGTCAACCGACCGTGCCTGGGCCCCATCTCTCCACTCAGGTACAATTGGCGCCCACCGTGGGGCCGAGGCAAATCTTCAATTTTTGAAGATATAATGGTTGCGACAAGAAACAACAACGACGCTATGGCAGAACAGATGACTATGATTCAAATCCTCCAAGCTCAGATGGAGGAACTGCGACAAAAGGGGATGGAAGACCATCGTCAACATGAAGAAGATCGACGCCTCCAAGAAGAAAATAGACGCCGCCAAGAAGAAGAAATCGCCTTATTAAGAGAGCAGAATGCACGACTCCAACAACAGGTCGATAATCCCGAACGAGAAGGCCAATCCCATATGGCCGACCGAACCGCCTCTCGCATACCTACACCTGCCAATACCAATCCTGCTTCCAGAGCTGAAACAGTCGAAAGAAAGTCAAGTAAAAGGGGTCATCCTTTTACAGACGAAATTATCACCACTCCACTTCCTGACAAATGGAGAGGCCTCGTCATTAAACTCTATGACGGCTCAACCGACCCGGACGAACACTTAAATGTCTACAAGACGCAAATGACTTTGTATACCACAGATAACAATGTGTGGTGTAAAGTATTTCCCACGTCGCTCCAGGGAGAACCTCTTACCTGGTTCACAGAGCTGCCTCCAAACTCCATTAACGATTTTGACATCCTAGCCGCAAAATTCTCCACTCAATATGCCACTAGCCGACCGCATCACATGTCCTCCATGTCTCTCCTAGCGGTACAACAAGAAAAAGGTGAATCTCTTAGAACCTTTCTAGATAGGTTCAACAAAGCATGCATGAACATCCGAGGGCTCAAACAAGAGGTTGCATTGCACCATTTGGTCTCGGCCATCCGACCGAGCCGTTTCACTGAAAGTCTCATCAAGAAACCACCTCAAGACATGGAGGACCTTCGAACTCGAGCAACCAAATTCATGCAAATCGAAGAACACATTGATTACCATCAACGGTTCAAAGCTGTCGGATTCGGAGCCCTTAAAGACCAAACTCAAAGTAAAGAAAGAGAAGTCGAAACCGAACGAACCGTCCGAACCACTCTGAGGTCCGACCGGAATAGGGGAGGCCGAATCCCCAGGTTTAACAGTTACACCCCTTTAACTGTGCCGAGGGGACGAGCCCTAGATGAAGCACTACAAACGGACCTAATCCCGACATTGAAGCAGTATCAAACACCACCGAATGCAGATACTGCTAAGCGTTGTCAATACCATCAGAATTTCGGTCACACGACCGAAGGATGTCAAGCTTTGAAGGATAAAATTGAAGAACTCATCCAAGCTGGCCATTTACGGCAGTTCGTCAAGAGGACAAGGAGTTCAAAATCCCCACCACGGAATACTGACCGTCCTTCCCGTGGTGTCGACCGGTCATACCGTAACGATTACAAACGCCACACTGACCGTAGCCAGACTTCGCGAAAACGCAGCGAAAGCCCCGTTCGGCGTACACGCGCCCGTAGCACAAGTCCCGACCGAAACGCCCGACCTCGCCAACGAGTCCGCGAAGTCATCAACATGATTGCTGGACCCGTTAACTTGGGCGAACCGAACCACGAAACAAATTATATAGCTGGAGGATTTGCCGGTGGCGGGTGCTCAAATTCCGCCCGAAAGAAACATCTCCGTGACATCCAGTCCGCTCATGCTACCACGAGGAGGCGTCCACATATACCTCCGATTACTTTCACTGACGAAGACTTTACAGCCATAGATCCAGCCCAGGACGACCCCATGGTCATTACTGTAGAAATTGACAAGTTCGCAATTGCCAAGACTTTGGTAGATCAGGGTAGCTCGGTCGACATACTGTATTGGGACATTTTCAAGAAAATGCGCATCCCAGAAGCACATATTCAGCCCTATAACGAACAAATTGTAGGGTTCTCAGGTGAACGGGTCGATACTAAGGGGTACATAGACTTGTACACAACCTTTGGTGAGGAAGACGGCCTCCATAAAACAATAAACGTACGATACCTCCTGGTTAACGCACAAACTTCCTACAACATCCTGCTCGGTCGTCCGTCCATTAACAGATTAAAAGCCATTGTGTCCACTCCACACTTAGCCATGAAATTCCCCTCGGCTAACAACGACATTGCAACCATCCATGTCGATCAAAAAACCGCTAGGGAATGCTATGTAGCAAGTTTGAAAAGTGAGCCAACTCGACGACTCTATACAACCAATACGGACGACCGAGTCCCGCAAAAACGAGGACGTTCCCCCACCCGGCGTTCCGGACGACACATGTCTCGTCGTCAAATGATAGCCCTTGTTGACCTCGACCCTCGCATGGACGATCCCCGTATGGAAGCAGGAGAAGACTTGCATCCATTCCCGCTTCGCGATGATCGCCACACTACGCACATCGGTACTTCGCTGAAACCGGACGACCTAATGGCCATCGGGACGACACTTGTTAAAAATTCCGATCTTTTCGCCTGGACGGCCGCTGATATGCCTGGCGTAGACCCACAGGTTATCACTCACCGATTATCACTGTATAGAGAAGCTAAGCCAATAGCTCAAAAGAAAAGACATATAGGCGAGGAACGACGTCAAGCCGCACGTGAGGAAGCCGACAAATTGTTACAGGCTGGATTCATTCGGAAGGCCCATTACACCACATGGCTAGCCAACGTGGTTATGGTGAAGAAAGCGAACGGAAAATGGCGTATGTGTGTTGACTACACAGACCTCAATAAAGCTTGCCCAAAAGACTCGTATCCTCTGCCTACCATTGATCGTCTCGTCGACGGTGCAGCCGGGCATCACATCCTCAGCTTCCTTGATGCCTATTCTGGCTATAATCAAATCCAAATGCACCCGGCCGACCGGAAGAAGACGGCCTTCATGACTGATTCCGGCAATTTCTACTATGAAGTGATGCCCTTCGGACTCAAAAATGCCGGAGCCACTTATCAAAGACTAATGGACCACGTATTCCACGACATGATTGGTAGGAATGTTGAAGTCTATGTCGATGACATCGTCGTCAAGTCCGACTCATGCAAACAACATATTGCCGACCTAAAAGAAGTTTTTCAGGCCCTCCGCCAACACCAGATGCGACTCAATCCGGACAAGTGTGCGTTCGGCGTCGAGGGGGGGAAGTTCTTAGGTTTTATGCTAACTCATAGAGGCATAGAAGCTAACCCCGAGAAGTGCAGAGCTATCTCCGAAATGCGAAGTCCCAACTCCATTCAGGAAATTCAGAGACTTATCGGCCGACTCACCGCACTATCCAGATTTGTTCCTAAACTCGCCGAACGAACGAGGCCCATCGTCCGACTACTGAAAAAAGCATCCCGCTTCGAGTGGTCGACCGAATGTGAGGAAATTTTCCTCGATTTGAAAACTTTTTTATCAACCCCGCCGGTCATCCAGAAACCGGACGCACGAGAACCCATCATAGTCTACCTCGCCGTTTCACACGAAGCCGTCAGCTCAGTCTTAGTGCAAGAAATTAATTTTGAAGAACGGCCGGTTTACTTCGTCAGCCGCGCCCTTCATGGCGCCGAAATCCGATACCAGACGATCGAAAAGGTAGCCATGGCCCTCATCATTACCGCCCGACGAATGCGTATGTATTTTCAGAATCATCGGATTATTGTTCGGACAAATTACCCTATTGTAAAGATCCTCACTAAGCCAGATTTAGCCGGACGAATGATCAGTTGGACGATCGAACTATCCGAATTCCATATTCAGTACCAACCACGCGGAGCGATCAAGTCGCAAGCTCTCGCCGACTTCGCAGCTGAACTCACTACTTCTTCAGCCGAGACCGAACATTCATCATGGATCTTATATGTTGATGGCTCCTCCAACGAGAGGTCGTGCGGCGCTGGAGTTGTTTTGGAAGGCCCCGGCGAGATTGTCATCGAGCAAGCCCTCAAATTCGACTTCAAAGCTTCAAACAATCAGGCCGAATATGAAGCCATATTAGCCGGTCTACGTCTCGCTCAAGAATTAGAAATCACTAAGTTAATTTGCAAAAGTGATTCCCGGCTTGTCATCGGTCAGCTTAACGACGAATATGAAGTCCGAGAAAGCTTTTTACAGCGATACTATCACTTAGTCAAACAGTCGATGAGCACCTTTTCTGAAATTTCTATGCAGCACGTTCGACGCGATCACAATACCCGCGCGGACGCCTTGTCCCGGTTAGCAACCACGAAGTGTAAAGGAATGCATCGGTCGGTCATCCATGTTACGCTTGCACGCCCAAGCATCGACCTACAGGAATGCCTGACGACCGACACGGAATCCACTTGGATTACCCCAATCAAGCAATATTTACTCGACGGCACATGTAGTCCTCTCGGCGAAAAAACCATGAAGCTGCAGGCCGCCCGTTTTGTCTTAATCGGCGACGACCTTTATCGCCGAGGTTATACCCAACCACTCCTTAAATGTTTGACACCAGACCAAGCTTCCTATGTCATCCAAGAGTTGCACGAAGGAATTTGCGGAACTCACTCCGGCGCACGGACAATGGCTGCCAAAGTATTCCGGGCCGGATACTACTGGCCGACCGTCCAGGGTGACTGCACCAATTTCGTACAAAAATGTCTTAAATGCCAAGAGTTTGGCACTTTGTCCCATCAAAAGCCTGAGGAACTCCATTTTATGTTATCACCTTGGCCGTTCGTCCAATGGGGTATGGACATCATTGGTCCTTTCGCCCCCGGTAAAGGCCAGTGTAAATTCTTACTAGTCGGCATTGATTACTTCACCAAGTGGATCGAAGCCGAGCCCCTGACTGCAATCACCGCCCGCAATGTTCAAAATTTCGTATGGAAAAATATCGTTTGCCGCTTCGGGCTTCCTCAAATCATCATCACCGATAACGGTCGGCAATTCACCGACCGAACGTTAGCTGAATTTTACGAGAAGCTCCACATCAAACACATCGCTAGTTCAGTCGAACATCCGCAAACAAACGGACAGGCAGAAGCTGGAAACAAAGTTATTTTGAACGAACTGAAGAAACGTCTCGGCCCAGCAAAGGGCAACTGGACTGAAGAACTCTTAGAAGTATTATGGGCATATCGCTGTACTCCTCAGACGACTACACAAGAAACGCCGTACAGCCTAACGTATGGCACCGAAGCAATGATCCCCGTCGAGATTGGCGAACCCTCTCTCCGCCGGCAAACCCTTGATCTTGATCTAAACAAGGAAAGCCTCTCGGTCGGTCTCGATCTCATCAACGAACTCCGGGACAAGTGTAGAATTAGAGAAGAAGCATGCAAAATTCGGGCGGCCAGACGATACAACTCCAAAGTTAAACCAAGATTGTTCCACAAAGGCGACTTAGTATGGCGAATGCGGAGCAGCGCACGGAAGGAAGGAGGCAAGTTCTCCAGCAATTGGGAAGGACCTTTCCGCATAGCAGATACGGCAGCCGGTGGAGCCTATTATTTAGAATATTTATCTGGGAAGGAAATACCGAGAACGTGGAATGCCACACATCTCAAATTTTATTACAGTTGAACTTTAATAATAAAAGTGCACTCTTTCCTCGCTCGGTCGGTTTTTCCCTAAGGAGGGTTTACGACCGGGAAGGTTTTAACGAGGCACTAAATTAAAATCCAAATCTCCTAGTCCTTTACTCAATTCATATCTCGTTCGGTTTCATAGGTATTTAACGAAATCAGAATTTATCGGATTTATATATGCCTCGCTCGGCATCAGAATTATTACTTTTAACGTAGTGAGAATTATATATGCCTCGTTCGGCATCAGAATTATTACTTTAACGTAATAATAATTATTTATGCCTCGTTCGGCATCAGAATTTATCGGATTTATATATGCCTCGCTCGGCATCAGAATTATTACTTTTAACGTAGTCAGAATTATATATGCCTCGTTCGGCATCAGAATTATTACTTTAACGTAATAATAATTATTTATGCCTCGTTCGGCATCAGAATTTATCGGATTTATATATGCCTCGCTCGGCATCAGAATTATTACTTTTAACGTAGTCAGAATTATATATGCCTCGTTCGGCATCAGAATTATTACTTTAACGTAATAATAATTATTTATGCCTCGTTCGGCATCAGAATTTATCGGATTTATATATGCCTCGCTCGGCATCAGAATTATTACTTTTAACGTAGTCAGAATTATATATGCCTCGTTCGGCATCAGAATTATTACTTTAACGTAATAATAATTATTTATGCCTCGTTCGGCATCAGAATTTATCGGATTTATATATGCCTCGCTCGGCATCAGAATTATTACTTTTAACGTAGTCAGAATTATATATGCCTCGTTCGGCATCAGAATTATTACTTTAACGTAATAATAATTATTTATGCCTCGTTCAGCATCAGAATTTATCGGATTTATATATGCCTCGCTCGGCATCTGAATTATTACCTTAACGTAATCAGAATTATTTATGCCACGTTCGGCATCAGAATTATTTACTCAATCTTATGCCTCGTTCGGCATCTGAATTATTACCTTAACGTAATCAGAATTATTTATGCCACGTTCGGCATCAGAATTATTTACTCAATCTTATGCCTCGTTCGGCACCTGAATTATTACCTTAACGTAATCAGACTTTTTTATGCCACGTTCGGCATCAGAATTATTCACTTATTTATGCCTCATTCGACATCAGAATTATCTTATTACTTTAATGTAATCAGAATTATTTATGCCTCGTCCGGCATCAGAATTATCTTATTACTTTAATGTAATCAGAATTATTTATGCAAGTGTGCATTGCCCACATGTCGGGTCCAGCAATTTTCTATGCCACATTGTTCATTAACTCTTCAAAAGAGGCGTCAGGCTGTGAGCCTCCCCCTCGGCCTCCTCATTTAAATTATCATCGGGGTTGACCGGCACCAGCTTTCCATCAACTATTATTTTTTCTGTCGTACTGGTCGTCCTCCAGGGGTGCTCCATGCAGGCAGGCCGCTTGTCCGACGCCTAACCGAAAATATTCTTCGCTAATGCGAA

>chr8_53873432-53878491-_BAT93

ACCTCCGAAGAATAAGGAATATGCGTTTAGAGAAGATATGTTCCCCGGGTATTCCGGAGCACGACTGACAAGACATATCCATAACCACCCTGAGCCCAAGGGATAGAAAGCCCATTAGGCAATCCTATAAATACTGTGCTCAAGCCAGAGAAAGGTACGTTTTCATTCACTTACGAAACTGCGCTTAGAATCTCATACTTACTTGAGCGTCGGAGTGCCTTCGCAGGTACCCTCCCCCGCCCGACCGAAGTGGATAGCACGAAGGGACGACCGACCAAAGGAGACAGCAAGAAAGGACAATCGACCAGAGGAGAAGAAGATCAACACGTCAGCAATTACACCACGTCAACCGACCGTGCATGGGCCCCATCTCTCCACTCAGGTACAATTGGCGCCCACCGTGGGGCCGAGGCAAATCTTCAATTTTTGAAGCTATAATGGTTGCGACAAGAAACAACAACGACGCTATGGCAGAACAGATGACTATGATTCAAATCCTCCAAGCTCAGATGGAGGAACTGCGACAAAAGGGGATGGAAGACCATCGTCAACATGAAGAAGATAGACGCCTCCAAGAAGAAGATAGACGCCGCCAAGAAGAAGAAATCGCCTTATTAAGAGAGCAGAATGCACGACTCCAACAACAGGTCGATAATCCCGAACGAGAAGGCCAATCCCATATGGCCGACCGAACCGCCTCTCGCATACCTACACCTGCCAATACCAATCCTGCTTCCAGAGCTGAAACAGTCGAAAGAAAGTCAAGTAAAAGGGGTCATCCTTTTACAGACGAAATTATCACCACTCCACTTCCTGACAAATGGAGAGGCCTCGTCATTAAACTCTATGACGGCTCGACCGACCCGGACGAACACTTAAATGTCTACAAGACGCAAATGACTTTGTATACCACAGATAACAATGTGTGGTGTAAAGTATTTCCCACGTCGCTCCAGGGAGAACCTCTTACCTGGTTCACAGAGCTGACTCCAAACTCCATTAACGATTTTGACATCCTAGCCGCAAAATTCTCCACTCAATATGCCACTAGCCGACCGCATCACATGTCCTCCATGTCTCTCCTAGCGGTACAACAAGAAAAAGGTGAATCTCTTAGAACCTTTCTAGATAGGTTCAACAAAGCATGCATGAACATCCGAGGGCTCAAACAAGAGGTTGCATTGCACCATTTGGTCTCGGCCATCCGACCGAGCCGTTTCACTGAAAGTCTCATCAAGAAACCACCTCAAGACATGGAGGACCTTCGAACTCGAGCAACCAAATTCATGCAAATCGAAGAACACATTGATTACCATCAACAGTTCAAAGCTGTCGGATTCGGAGCCCTTAAAGACCAAACTCAAAGTAAAGAAAGAGAAGTCGAAACCGAACGAACCGTCCGAACCACTCTGAGGTCCGACCGGAATAGGGGAGGCCGAATCCCCAGGTTTAACAGTTACACCCCTTTAACTGTGCCGAGGGGACGAGCCCTAGATGAAGCACTACAAACGGACCTAATCCCGACATTGAAGCAGTATCAAACACCACCGAATGCAGATACTGCTAAGCGTTGTCAATACCATCAGAATTTCGGTCACACGACCGAAGGATGTCAAGCTTTGAAGGATAAAATTGAAGAACTCATCCAAGCTGGCCATTTACGGCAGTTCGTCAAGAGGACAAGGAGTTCAAGATCCCCACCACGGAATACTGACCGTCCTTCCCGTGGTGTCGACCGGTCGTACCGTAACGATTACAAACGCCACACTGACCGTAGCCAGACTTCGCGAAAACGCAGCGAAAGCCCCGTTCGGCGTACACGCGCCCGTAGCACAAGTCCCGACCGAAACGCCCGACCTCGCCAACGAGTCCGCGAAGTCATCAACATGATTGCTGGACCCGTTAACTTGGGCGAACCGAACCACGAAGTTAATTATATAGCTGGAGGCTTTGCCGGTGGCGGGTGCTCAAATTCCGCCCGAAAGAAACATCTCCGAGACATCCAATCCGCTCATGCTACCACAAGGAGGCGTCCACACATACCTCCGATCACCTTCACTGACGACGACTTTACGGCTATAGATCCAGCCCAGGACGACCCTATGGTAATCACTGTCGAAATTGACAAGTTCGCAATTGCCAAGACCTTGGTCGACCAAGGTAGCTCAGTCGACATATTATACTGGGAAATCTTCAAAAAAATGCGCATTCCAGAATCAGAAATTCAACCCTATAACGAACAAATTGTAGGGTTCTCAGGTGAACGGGTCGACACTAACGGGTATATAGACTTGTATACAACCTTCGGTGAGGAAGATGGTCTCCACAAAACAATAAACGTACGATATCTGCTGGTTAACGCCCAGACTTCTTACAACATCCTGCTCGGCCGGCCGTCTATCAACAGATTAAAAGCCATTGTCTCCACCCCACACTTAGCCATGAAATTCCCTTCGGCCACTAACGACATTGCAACCATCCATGTCGATCAAAAAACCGCTAGGGAATGCTATGTAGCAAGTTTGAAAAGTGAGCCAACTCGACGACTCTATACAACCAATACAGACGACCGAGTCCCGCAAAAACGAGGACGTTCCCCCACACGGCGTTCCGGACGACACATGTCCCGTCGTCAAATGATAGCCCTTGTTGACCTCGACCCTCGCATGGACGATCCCCGTATGGAAGCAGGAGAAGACTTGCATCCATTCCCGCTTCGCGATGATCGCCACACTACGCACATCGGTACTTCGCTGAAACCGGACGACCGAATGGCCATCGGGACGACACTTGTTAAAAATGCCGATCTTTTCGCCTGGACGGCCGCTGATATGCCTGGCGTAGACCCACAGGTTATCACTCACCGATTATCACTGTATAGAGAAGCTAAGCCAATAGCTCAAAAGAAAAGACATATAGGCGAGGAACGACGTCAAGCCGCACATGAGGAAGCCGACAAATTGTTACAGGCTGGATTCATTCGGAAGGCCCATTACACCACATGGCTAGCCAACGTGGTTATGGTGAAGAAAGCGAACGGAAAATGGCGTATGTGTGTTGACTACACAGACCTCAATAAAGCTTGCCCAAAAGACTCGTATCCTCTGCCTACCATTGATCGTCTCGTCGACGGTGCAGCCGGGCATCACATCCTCAGTTTCCTTGATGCCTACTCTGGCTATAATCAAATCCAAATGCACCCGGCCGACCGGAAGAAGACGGCCTTCATGACTGATTCCGGCAATTTCTACTATGAAGTGATGCCCTTCGGACTCAAAAATGCCGGAGCCACTTATCAAAGACTAATGGACCACGTATTCCACGACATGATTGGTAGGAATGTTGAAGTCTATGTCGATGACATCGTCGTCAAGTCCGACTCATGCAAACAACATATTGCCGACCTAAAAGAAGTTTTTCAGGCCCTCCGCCAACACCAGATGCGACTCAATCCGGACAAGTGTGCGTTCGGCGTCGAGGGGGGGAAGTTCTTAGGTTTTATGCTAACTCATAGAGGCATAGAAGCTAACCCCGAGAAGTGCAGAGCTATCTCCGAAATGCGAAGTCCCAACTCCATTCAGGAAATTCAGAGACTTATCGGCCGACTCACCGCACTATCCAGATTTGTTCCTAAACTCGCCGAACGAACGAGGCCCATCGTCTGACTACTGAAAAAAGCATCCCGCTTCGAGTGGTCGACCGAATGTGAGGAAATTTTCCTCGATTTGAAAACTTTTTTATCAACCCCGCCGGTCATCCAGAAACCGGACGCACGAGAACCCATCATAGTCTACCTCGCCGTTTCACACGAAGCCGTCAGCTCAGTCTTAGTGCAAGAAATTAATTTTGAAGAACGACCGGTTTACTTCGTCAGCCGCGCCCTTCATGGCGCCGAAATCCGATACCAGACGATCGAAAAGGTAGCCATGGCCCTCATCATTACCGCCCGACGAATGCGTATGTATTTTCAGAATCATCGGATTATTGTTCGGACAAATTACCCTATTGTAAAGATCCTCACTAAGCCAGATTTAGCCGGACGAATGATCGGTTGGACGATCGAACTATCCGAATTCCATATTCAGTACCAACCACGCGGAGCGATCAAGTCGCAAGCTCTCGCCGACTTCGCAGCTGAACTCACTACTTCTTCAGCCGAGACCGAACATTCATCATGGATTTTATATGTTGATGGCTCCTCCAACGAGAGGTCGTGCGGCGCTGGAGTTGTTTTGGAAGGCCCCGGCGAGATTGTCATCGAGCAAGCCCTCAAATTCGACTTCAAAGCTTCAAACAATCAGGCCGAATATGAAGCCATATTAGCCGGTCTACGTCTCGCTCAAGAATTAGAAATCACTAAGTTAATTTGCAAAAGTGATTCCCGGCTTGTCATCGGTCAGCTTAACGACGAATATGAAGTCCGAGAAAGCTTTTTACAGCGATACTATCACTTAGTCAAACAGTCGATGAGCACCTTTTCTGAAATTTCTATGCAGCACGTTCGACGCGATCACAATACCCGCGCGGACGCCTTGTCCCGGTTAGCAACCACGAAGTGTAAAGGAATGCATCGGTCGGTCATCCATGTTACGCTTGCACGCCCAAGCATCGACCTACAGGAATGCCTGACGACCGACACGGAATCTACTTGGATTACCCCAATCAAGCAATATTTACTCGACGGCACATGTAGTCCTCTCAGCGAAAAAACCATGAAGCTGCAGGCCGCCCGTTTTGTCTTAATCGGCGACGACCTTTATCGCCGAGGTTATACCCAACCACTCCTTAAATGTTTGACACCAGACCAAGCTTCCTATGTCATCCAAGAGTTGCACGAAGGAATTTGCGGAACTCACTCCGGCGCACGGACAATGGCTGCCAAAGTATTCAGGGCCGGATACTACTGGCCGACCGTCCAGGGTGACTGCACCAATTTCGTACAAAAATGTCTTAAATGCCAAGAGTTTGGCACTTTGTCGCATCAAAAGCCTGAGGAACTCCATTTTATGTTATCACCTTGGCCGTTCGTCCAATGGGGTATGGACATCATTGGTCCTTTC
